# Supplementary material for: What are the factors that contribute to the development of sexual dysfunction in breastfeeding women? A systematic scoping review protocol
Source: PubMed Central journal article supplement — BMJ Open. 2018 Aug 30;8(8):e022863. doi: 10.1136/bmjopen-2018-022863 (PMC6119408; doi:10.1136/bmjopen-2018-022863), 2018-08-30
Supplement: bmjopen-2018-022863.draft_revisions.pdf [file bmjopen-2018-022863.draft_revisions.pdf]

# BMJ Open

BMJ Open is committed to open peer review. As part of this commitment we make the peer review history of every article we publish publicly available.

When an article is published we post the peer reviewers' comments and the authors' responses online. We also post the versions of the paper that were used during peer review. These are the versions that the peer review comments apply to.

The versions of the paper that follow are the versions that were submitted during the peer review process. They are not the versions of record or the final published versions. They should not be cited or distributed as the published version of this manuscript.

BMJ Open is an open access journal and the full, final, typeset and author-corrected version of record of the manuscript is available on our site with no access controls, subscription charges or pay-per-view fees (<http://bmjopen.bmj.com>).

If you have any questions on BMJ Open's open peer review process please email [info.bmjopen@bmj.com](mailto:info.bmjopen@bmj.com)

# BMJ Open

## Factors that contribute to the development of sexual dysfunction in breastfeeding women: a systematic scoping review protocol

|                               |                                                                                                                                                                                                                                                                                                                                                                                                                                                                                                                                                                                                                                                                                                                                                                                                                                                                                                                                                                                                                                                                                                                                                                                                                                              |
|-------------------------------|----------------------------------------------------------------------------------------------------------------------------------------------------------------------------------------------------------------------------------------------------------------------------------------------------------------------------------------------------------------------------------------------------------------------------------------------------------------------------------------------------------------------------------------------------------------------------------------------------------------------------------------------------------------------------------------------------------------------------------------------------------------------------------------------------------------------------------------------------------------------------------------------------------------------------------------------------------------------------------------------------------------------------------------------------------------------------------------------------------------------------------------------------------------------------------------------------------------------------------------------|
| Journal:                      | <i>BMJ Open</i>                                                                                                                                                                                                                                                                                                                                                                                                                                                                                                                                                                                                                                                                                                                                                                                                                                                                                                                                                                                                                                                                                                                                                                                                                              |
| Manuscript ID                 | bmjopen-2018-022863                                                                                                                                                                                                                                                                                                                                                                                                                                                                                                                                                                                                                                                                                                                                                                                                                                                                                                                                                                                                                                                                                                                                                                                                                          |
| Article Type:                 | Protocol                                                                                                                                                                                                                                                                                                                                                                                                                                                                                                                                                                                                                                                                                                                                                                                                                                                                                                                                                                                                                                                                                                                                                                                                                                     |
| Date Submitted by the Author: | 12-Mar-2018                                                                                                                                                                                                                                                                                                                                                                                                                                                                                                                                                                                                                                                                                                                                                                                                                                                                                                                                                                                                                                                                                                                                                                                                                                  |
| Complete List of Authors:     | Fuentealba-Torres, Miguel; University of São Paulo, Department of Maternal-Infant and Public Health Nursing;<br>Cartagena-Ramos, Denisse ; University of São Paulo, Department of Maternal-Infant and Public Health Nursing<br>Sierra, JC; University of Granada, Department of Personality, Evaluation and Psychological Treatment<br>Lara, Lúcia ; University of São Paulo, Department of Gynecology and Obstetrics<br>Okano, Sérgio; University of São Paulo, Department of Gynecology and Obstetrics<br>Berra, Thaís; University of São Paulo, Department of Maternal-Infant and Public Health Nursing<br>Alves, Luana; University of São Paulo, Department of Maternal-Infant and Public Health Nursing<br>Leite, Ana Carolina; University of São Paulo, Department of Maternal-Infant and Public Health Nursing<br>Yamamura, Mellina; University of São Paulo, Department of Maternal-Infant and Public Health Nursing<br>Silva, Isília; University of São Paulo, Department of Maternal-Infant and Psychiatric Nursing<br>Nascimento, Lucila; University of São Paulo, Department of Maternal-Infant and Public Health Nursing<br>Arcêncio, Ricardo; University of São Paulo, Department of Maternal-Infant and Public Health Nursing |
| Keywords:                     | Breast Feeding, Physiological Sexual Dysfunction, Psychological Sexual Dysfunction, Sexual Behavior, Sexual Health                                                                                                                                                                                                                                                                                                                                                                                                                                                                                                                                                                                                                                                                                                                                                                                                                                                                                                                                                                                                                                                                                                                           |
|                               |                                                                                                                                                                                                                                                                                                                                                                                                                                                                                                                                                                                                                                                                                                                                                                                                                                                                                                                                                                                                                                                                                                                                                                                                                                              |

SCHOLARONE™  
Manuscripts

1  
2  
3  
4  
5  
6  
7  
8  
9  
10  
11  
12  
13  
14  
15  
16  
17  
18  
19  
20  
21  
22  
23  
24  
25  
26  
27  
28  
29  
30  
31  
32  
33  
34  
35  
36  
37  
38  
39  
40  
41  
42  
43  
44  
45  
46  
47  
48  
49  
50  
51  
52  
53  
54  
55  
56  
57  
58  
59  
60

**Title page**

**Factors that contribute to the development of sexual dysfunction in breastfeeding women: a systematic scoping review protocol**

Miguel Fuentealba-Torres 1, Denisse Cartagena-Ramos 1, Juan Carlos Sierra 2, Lúcia Alves Lara 3, Sérgio Pires Okano 3, Thaís Zamboni Berra 1, Luana Seles Alves 1, Ana Carolina Andrade Biaggi Leite 1, Mellina Yamamura 1, Isília Aparecida Silva 4, Lucila Castanheira Nascimento 1, Ricardo Alexandre Arcêncio 1.

**Author affiliations**

1 Departament of Maternal-Infant and Public Health Nursing, University of São Paulo, Ribeirão Preto, Brazil.

2 Centro de Investigación Mente, Cerebro y Comportamiento (CIMCYC), University of Granada, Granada, Spain.

3 Departament of Gynecology and Obstetrics, University of São Paulo, Ribeirão Preto, Brazil.

4 Departament of Maternal-Infant and Psychiatric Nursing, University of São Paulo, São Paulo, Brazil.

**Corresponding author:**

Miguel Fuentealba-Torres, Collage of Nursing at Ribeirão Preto, University of São Paulo, Brazil.

Full mailing address: Avenida Bandeirantes, 3900. Ribeirão Preto. São Paulo State – Brazil. Zip code: 14040-902. Telephone: +55 16 3315-3435

e-mail: mfuatealba@usp.br

1                   **Factors that contribute to the development of sexual dysfunction in breastfeeding**  
2                   **women: a systematic scoping review protocol**

3 **ABSTRACT**

4 **Introduction:** Female Sexual Dysfunction constitutes a public health problem. Evidence  
5 indicates that the population of nursing women is more vulnerable to the phenomenon due  
6 to breastfeeding. Thus, a systematic scoping review protocol was developed to explore the  
7 factors that contribute to the development of sexual dysfunction in nursing mothers.

8 **Methods and analysis:** The systematic scoping review will be conducted in six stages,  
9 according to the PRISMA-P. The databases used will be: PubMed, Excerpta Medica  
10 Database (EMBASE), Cumulative Index to Nursing and Allied Health Literature  
11 (CINAHL), PsycINFO, Science Direct, Web of Science and Google Scholar. For the  
12 organization of the literature retrieved from the databases, the EndNote Basic manager  
13 (Clarivate Analytics, 2017) will be used. The Cochrane model will be used for the data  
14 extraction. The analysis of the quantitative data will be carried out through descriptive  
15 statistics and the qualitative data will be submitted to thematic analysis. The  
16 methodological quality of the empirical studies will be evaluated using the Mixed Methods  
17 Appraisal Tool (MMAT).

18 **Ethics and dissemination:** As it will be a review study, without human involvement, there  
19 will be no need for ethical approval. The results will be disseminated in a scientific journal,  
20 as well as in various media, such as: conferences, seminars, congresses or symposia.

21 **Strengths and limitations of this study:**

22 This scoping review will be the first to explore of the factors that contribute to the  
23 development of sexual dysfunction in breastfeeding women.

24 The results of the review will contribute to the advancement of the knowledge of this  
25 problem and to the orientation of new studies.

26 This protocol also serving as a reference for future reviews.

27 The scarcity of empirical studies, the publication bias and the methodological quality of the  
28 gray literature found may be the main limitations of the study.

29 **Keywords**

30 Breast Feeding, Physiological Sexual Dysfunction, Psychological Sexual Dysfunction,  
31 Sexual Behavior, Sexual Health

## 1 INTRODUCTION

2 Sexual dysfunctions are a heterogeneous group of disorders, which affects the capacity for  
3 sexual response or sexual pleasure.<sup>1</sup> These disorders have been related to biological,  
4 psychological, cultural, behavioral and interpersonal determinants.<sup>2</sup>

5 Female Sexual Dysfunction (FSD) is considered a public health problem, affecting more  
6 than 40% of the world population of women.<sup>3</sup> A systematic review estimated that the  
7 prevalence of FSD in populations over 18 years of age ranges from 5.5% to 73.2%<sup>4</sup> and a  
8 meta-analysis estimated that the prevalence of sexual dysfunction among middle-aged  
9 women age is 40.9%.<sup>5</sup>

10 The literature suggests that breastfeeding women may be at increased risk of developing  
11 sexual dysfunction.<sup>6-8</sup> Despite the lack of systematic reviews and shortage of empirical  
12 studies, which makes it impossible to identify associated factors, risk factors or predictive  
13 factors for the development of FSD in nursing women, exploratory studies suggest that  
14 hyperprolactinemia, hypoestrogenism and the context of motherhood influence the female  
15 sexual response and make mothers more vulnerable to the development of sexual  
16 dysfunctions.<sup>9-14</sup>

17 This work consists of a systematic scoping review protocol was developed to explore the  
18 factors that contribute to the development of sexual dysfunction in nursing mothers. The  
19 systematic Scoping Review contributes to the clarification of knowledge gaps in lightly  
20 researched phenomena by performing a comprehensive mapping of available scientific  
21 literature, including the gray literature.<sup>15,16</sup>

22 This review will be conducted with the aim of exploring the factors that contribute to the  
23 development of FSD in the nursing population, with the purpose of guiding future research  
24 to advance the knowledge of this problem.

## 1 METHODS AND ANALYSIS

2 This work constitutes a protocol for a Systematic Scoping Review, which will be developed  
3 according to the steps proposed by Arksey and O'Malley<sup>15</sup> and subsequent  
4 recommendations.<sup>16,17</sup> The six stages consist of: 1) Identifying the research question; 2)  
5 Identifying relevant studies; 3) Study selection; 4) Charting the data 5) Collating,  
6 summarizing, and reporting results; and 6) Consultation.<sup>15,16</sup>

7 This protocol follows the PRISMA-P guidelines (Supplementary file 1) for the  
8 bibliographic search process.<sup>18</sup> Currently, this research is in the second stage, which  
9 consists of identifying the relevant studies.

### 11 1. Identifying the research question

12 The research questions were discussed by the authors and, from a consensus, three research  
13 questions were elaborated, articulated for the purpose of the review. The questions were  
14 broad in nature and structured from three components: 1) the definition of the concept to be  
15 researched, 2) the target population and 3) the results of interest in health<sup>16</sup>. (Table 1)

17 **Table 1** Structure of the research questions of the systematic scoping review protocol

| 18 Questions                                                             | Concept            | Target population   | Results of interest in health                               |
|--------------------------------------------------------------------------|--------------------|---------------------|-------------------------------------------------------------|
| 19 What are the sexual behaviors of the breastfeeding women?             | Sexual Behaviors   | Breastfeeding Women | Sexual Behaviors of the breastfeeding women                 |
| 20 What are the aspects related to the sexuality in breastfeeding women? | Sexuality          | Breastfeeding Women | The aspects related to the sexuality in breastfeeding women |
| 21 What are the types of sexual dysfunctions in breastfeeding            | Sexual Dysfunction | Breastfeeding Women | The types of sexual dysfunction.                            |

women?

What are the factors that contribute to sexual dysfunctions in breastfeeding women?

Sexual  
Dysfunction

Breastfeeding  
Women

The factors that contribute to sexual dysfunctions.

1

2 In this step, the concepts and their definitions to be used to support the questions of this  
3 review were also determined. (Table 2)

4

5 **Table 2** Key concepts and definitions pertaining to the study questions

| Concept             | Definition                                                                                                                                                                                                                                                                            |
|---------------------|---------------------------------------------------------------------------------------------------------------------------------------------------------------------------------------------------------------------------------------------------------------------------------------|
| Sexuality           | This involved a broad perspective with some conceptual elements of the WHO definition <sup>19</sup> , in which personal functions, activities, attitudes, preferences, and behaviors on the personal, interpersonal, contextual, psychological, and biological levels are considered. |
| Sexual Dysfunction  | Involves a group of disorders that are typically characterized by clinically significant disorders in a person's ability to respond sexually or experience sexual pleasure <sup>1</sup> .                                                                                             |
| Breastfeeding women | Adopted with some elements of the WHO concept of breastfeeding and defined as a woman who is breastfeeding an infant from birth to 24 months of age <sup>20,21</sup> .                                                                                                                |

6

7 **Identification of relevant studies**

8 **Search Strategy**

9 The search strategies were articulated with the research questions and were developed by a  
10 team of librarians and researchers with experience in bibliographic searches in databases of  
11 the health area. The controlled vocabulary terms from the MeSH, APA Thesaurus,  
12 CINAHL Subject Headings and Entree Thesaurus were used in combination with keywords  
13 and the Boolean operators AND and OR. The search strategies were adapted according to  
14 the specificities of each database. The filters used were: literature with humans; in the

1 Spanish; Portuguese or English languages; without time limit or restrictions according to  
2 the type of study (Supplementary file 2).

3 The following multidisciplinary and health sciences electronic databases were used:  
4 PubMed, Excerpta Medica Database (EMBASE), Cumulative Index to Nursing and Allied  
5 Health Literature (CINAHL), PsycINFO, Science Direct, plus Google Scholar in the search  
6 for gray literature. In addition, studies will be identified through the references of the  
7 studies retrieved in the databases and selected for the review.

## 9 **Study Selection**

10 The selection process will be presented through the flow diagram Preferred Reporting Items  
11 for Systematic and Meta-Analyses (PRISMA), according to the steps: 1) identification; 2)  
12 screening; 3) eligibility and 4) inclusion.<sup>22</sup> (Supplementary file 3).

13 In the identification stage of the literature retrieved, all studies will be organized with the  
14 help of the EndNote Basic program, which manages the organization, storage, identification  
15 and removal of duplicate studies. Then the references will be exported to a database  
16 constructed using Microsoft Excel, version 2016.

17 In the screening stage, the pre-selection of potentially eligible literature will be performed.

18 In order to reduce possible bias in this step, independent reading of the titles and abstracts  
19 of the pre-selected studies will be performed independently by two reviewers (DCR and  
20 MFT). Using the SPSS version 23.0 software, the inter-observer agreement index between  
21 the reviewers DCR and MFT, using the Kappa criterion  $>80\%$  ( $p<0.05$ )<sup>23</sup> will be  
22 calculated. In case of disagreement in the selection of the studies, a third reviewer (RA)  
23 will be consulted.



1 The eligibility stage will be developed by a team of two reviewers (MFT and DCR). To  
2  
3 avoid possible biases, the reviewers will independently and comprehensively read the  
4  
5 literature pre-selected in the screening stage. In case of disagreement, a third reviewer (RA)  
6  
7 will be consulted.  
8  
9

10 To evaluate the inclusion or exclusion of eligible studies, reviewers will use the following  
11  
12 criteria:  
13  
14

15  
16  
17 **Inclusion criteria:**

- 18 1. Literature in English, Spanish or Portuguese, focused on the research questions  
19  
20 detailed in table 1.  
21  
22
- 23 2. Literature focusing on sexual dysfunction in the nursing population, including:  
24  
25 qualitative or quantitative empirical studies; studies of literature review, regardless  
26  
27 of the method used; and brief communications of ongoing studies.  
28  
29
- 30 3. Gray literature focusing on sexual dysfunction in the nursing population, including:  
31  
32 annals of congresses, conferences of organizations or societies; academic  
33  
34 dissertations, theses, books, book chapters, and government documents.  
35  
36

37  
38  
39  
40 **Exclusion criteria:**

41  
42 Studies focusing on the sexuality of pregnant women and brief communications with  
43  
44 inconsistent results will be excluded.  
45  
46

47  
48  
49 **Charting the data (extraction of the data)**

50  
51 In this step, the data will be extracted from the literature included, evaluating the quality of  
52  
53 the individual studies selected.  
54  
55

1 The following data will be extracted based on the Cochrane Consumer and Communication  
2 Review Group Data extraction template (2015)<sup>24</sup>: database, year, volume, pages, funding  
3 agency, country, language, title, type of study, method, inclusion and exclusion criteria,  
4 sample, characteristics of the population, place and period of the study. In addition,  
5 information will be extracted regarding the sexual behaviors of women who breastfeed, the  
6 types of sexual dysfunctions and the factors that contribute to female sexual dysfunction.  
7 (Supplementary file 4).

### 9 **Mapping of the literature included**

10 In order to visualize the geographic location of the literature included the articles will be  
11 geocoded, through the correspondence address of the first author listed in the article.  
12 Through the Google Earth™ Version 7.15 software, the geographic coordinates of these  
13 addresses will be obtained and later geocoded using the TerraView version 4.2.2 software.  
14 The final file of the geocoded addresses will follow the Universal Transverse Mercator  
15 (UTM) projection and the Geocentric Reference System for the Americas (SIRGAS) 2000  
16 datum. Finally, the articles included in the scoping review will be presented on the map of  
17 the world.

### 19 **Risk of bias (quality) assessment of individual studies**

20 To reduce possible biases, the data will be extracted by a team of six reviewers using the  
21 standardized extraction form adapted from the Cochrane Consumer and Communication  
22 Review Group Data extraction template (2016).<sup>24</sup> The quality of the empirical studies  
23 included in the review will be evaluated using the Mixed Methods Appraisal Tool  
24 (MMAT).<sup>25</sup> This instrument was developed to evaluate the methodological quality of

1 empirical studies included in systematic reviews, conducted through qualitative,  
2 quantitative and mixed methods. Subsequently, the evidence of methodological quality of  
3 the scope of the literature will be presented, including the evidence of studies that present  
4 low scores in the quality evaluation, which will not be excluded from the sample analyzed.

### 6 **Collating, summarizing, and reporting the data**

7 The selected studies will be characterized and the extracted data will be summarized to  
8 discuss the evidence that will support possible answers to the research questions and  
9 recommendations for future studies.

10 The characterization of the studies will cover: authors; year of publication; countries; aim  
11 of the study; population and sample size; place of study; method; results and evaluation of  
12 the methodological quality of empirical studies. (Supplementary file 5).

13 Summarization of the quantitative evidence will be presented by performing descriptive  
14 analyses, using contingency tables. For these analyses, the SPSS version 23.0 software will  
15 be used.

16 The summary of the qualitative evidence will be presented through the themes, constructed  
17 from the thematic deductive analysis. The thematic analysis process will be performed  
18 through the following steps: 1) familiarization with the data, 2) generation of initial codes,  
19 3) search for themes, 4) review of themes, 5) definition of the themes, and 6) articulation of  
20 the themes with the literature of the area and production of the final analysis.<sup>26</sup>

### 22 **Stakeholder consultation**

23 This is the final step of the review and will consist of consulting a panel of experts  
24 regarding the clinical implications of the evidence summarized in the study.<sup>16</sup>

1 The panel will be made up of three specialists: a researcher with experience in the area of  
2 breastfeeding; a researcher with training in psychology and with experience in the subject  
3 of sexuality; and a medical sexologist, with experience in research into sexual dysfunction.  
4 In this procedure, a synthesis with the preliminary results of the literature will be sent to the  
5 panel of specialists, later, two web-based conferences, approximately one hour long, will be  
6 scheduled to develop a group discussion regarding their opinions about the evidence found  
7 in the literature. In the first conference, the practical recommendations of the evidence,  
8 dissemination strategies and guidelines for future studies will be discussed. In the second  
9 conference, the final report of the research will be presented which will conclude with the  
10 practical recommendations, dissemination strategies and outlines for future studies  
11 contributed by the panel of experts at the first meeting.

### 13 **ETHICS AND DISSEMINATION**

14 As it will be a review study, without human involvement, there will be no need for ethical  
15 approval. The results will be disseminated in a scientific journal, as well as in various  
16 media, such as: conferences, seminars, congresses or symposia.

17 The results of the review will be disseminated in an open access journal to ensure access for  
18 undergraduate and graduate students, researchers, academics, and research groups, and will  
19 be disseminated at conferences aimed at students, researchers, health teams and the  
20 community of nursing women.

21  
22 The stages of the review will be presented in the following table.

| Stage of review at time of this submission                      | Started    | Completed  |
|-----------------------------------------------------------------|------------|------------|
| Preliminary searches                                            | 4/10/2017  | 30/11/2017 |
| Piloting of the study selection process                         | 11/12/2017 | 5/02/2018  |
| Formal screening of search results against eligibility criteria | 08/02/2018 | No         |
| Data extraction                                                 | No         | No         |
| Risk of bias (quality) assessment                               | No         | No         |
| Data analysis                                                   | No         | No         |

## Authors' Contributions

As this is a review of the scope of the literature, this review is being conducted by a team of 12 researchers. M. Fuentealba-Torres, D. Cartagena-Ramos, proposed the development of the study and coordinated the construction of this protocol, M. Fuentealba-Torres, D. Cartagena-Ramos, J.C Sierra, L. Lara, L. I. Silva, Nascimento and R. Arcêncio, development the theoretical aspects of method. M. Fuentealba-Torres, D. Cartagena-Ramos, J.C Sierra, L. Lara, S. Okano, T. Berra, L. Alves, A. Leite, M. Calori, L. I. Silva, L. Nascimento and R. Arcêncio discussed, consensus of the three research questions and articulated for the purpose of the review. M. Fuentealba-Torres, D. Cartagena-Ramos, S. Okano, T. Berra, L. Alves, A. Leite, M. Calori, performed the systematic search of the seven electronic databases. All authors read and approved the final manuscript.

## Acknowledgements

The authors acknowledge the funding received from the Coordination for the Improvement of Higher Education Personnel (CAPES) and National Council for Scientific and

1  
2  
3 1 Technological Development (CNPq), PEC-PG-Program, to the first and second authors, as  
4  
5 2 Doctoral Scholarships.

6  
7 3  
8  
9 4 **Competing interests**

10 5 The authors declare that they have no competing interests.

11 6  
12  
13 7 **Funding**

14 8 This research was funded by the Coordination for the Improvement of Higher Education  
15  
16 9 Personnel and National Council for Scientific and Technological  
17  
18 10 Development (CAPES/CNPq), Processes numbers 9243143 and 9191134.

19  
20  
21 11 **REFERENCES**

22 12 1 American Psychiatric Association. *Diagnostic and Statistical Manual of Mental*  
23  
24 13 *Disorders (DSM 5)*. Washington, DC: American Psychiatric Association 2013.

25  
26 14 2 McCabe MP, Sharlip ID, Lewis R, *et al*. Risk Factors for Sexual Dysfunction  
27  
28 15 Among Women and Men: A Consensus Statement From the Fourth International  
29  
30 16 Consultation on Sexual Medicine 2015. *J Sex Med* 2016;**13**:153–67.  
31  
32 17 doi:10.1016/j.jsxm.2015.12.015

33  
34 18 3 McCabe MP, Sharlip ID, Atalla E, *et al*. Incidence and Prevalence of Sexual  
35  
36 19 Dysfunction in Women and Men: A Consensus Statement from the Fourth  
37  
38 20 International Consultation on Sexual Medicine 2015. *J Sex Med* 2016;**13**:135–43.  
39  
40 21 doi:10.1016/j.jsxm.2015.12.019

41  
42 22 4 Muñoz AD, Camacho PL. Prevalencia y factores de riesgo de la disfunción sexual  
43  
44 23 femenina: revisión sistemática. *Rev Chil Obs Ginecol* 2016;**81**:168–80.

45  
46 24 doi:10.4067/S0717-75262016000300002

47  
48 25 5 McCool ME, Zuelke A, Theurich MA, *et al*. Prevalence of Female Sexual  
49  
50  
51  
52  
53

- 1  
2  
3 1 Dysfunction Among Premenopausal Women: A Systematic Review and Meta-  
4  
5 2 Analysis of Observational Studies. *Sex Med Rev* 2016;**4**:197–212.  
6  
7 doi:10.1016/j.sxmr.2016.03.002  
8  
9  
10 4 6 Abdool Z, Thakar R, Sultan AH. Postpartum female sexual function. *Eur J Obstet*  
11  
12 5 *Gynecol Reprod Biol* 2009;**145**:133–7. doi:10.1016/j.ejogrb.2009.04.014  
13  
14 6 7 Convery KM, Spatz DL. Sexuality & breastfeeding: what do you know? *MCN Am J*  
15  
16 7 *Matern Child Nurs* 2009;**34**:218–23. doi:10.1097/01.NMC.0000357913.87734.af  
17  
18 8 8 Leeman LM, Rogers RG. Sex after childbirth: postpartum sexual function. *Obstet*  
19  
20 9 *Gynecol* 2012;**119**:647–55. doi:10.1097/AOG.0b013e3182479611  
21  
22 10 9 Avery MD, Duckett L, Frantzich CR. The experience of sexuality during  
23  
24 11 breastfeeding among primiparous women. *J Midwifery Womens Health*  
25  
26 12 2000;**45**:227–37.  
27  
28 13 10 Acele EO, Karacam Z. Sexual problems in women during the first postpartum year  
29  
30 and related conditions. *J Clin Nurs* 2012;**21**:929–37. doi:10.1111/j.1365-  
31  
32 2702.2011.03882.x  
33  
34 15  
35 16 11 Barrett G, Pendry E, Peacock J, *et al.* Women’s sexual health after childbirth. *BJOG*  
36  
37 17 2000;**107**:186–95. doi:10.1111/j.1471-0528.2000.tb11689.x  
38  
39 18 12 Khajehei M, Doherty M, Tilley PJM, *et al.* Prevalence and risk factors of sexual  
40  
41 19 dysfunction in postpartum Australian women. *J Sex Med* 2015;**12**:1415–26.  
42  
43 20 doi:10.1111/jsm.12901  
44  
45 21 13 Rowland M, Foxcroft L, Hopman WM, *et al.* Breastfeeding and sexuality  
46  
47 22 immediately post partum. *Can Fam Physician* 2005;**51**:1367.  
48  
49 23 14 Shirvani MA, Bagheri-Nesami M, Bavand M. P507 Women’s sexual dysfunction  
50  
51 24 during the first year after child birth. *Int J Gynecol Obstet* 2009;**107**:S557--S557.  
52  
53  
54  
55  
56  
57  
58  
59  
60

- 1  
2  
3 1 doi:10.1016/S0020-7292(09)61997-4  
4  
5 2 15 Arksey H, O'Malley L. Scoping studies: towards a methodological framework. *Int J*  
6  
7 *Soc Res Methodol* 2005;**8**:19–32. doi:10.1080/1364557032000119616  
8  
9  
10 4 16 Levac D, Colquhoun H, O'Brien KK. Scoping studies: advancing the methodology.  
11  
12 *Implement Sci* 2010;**5**:69. doi:10.1186/1748-5908-5-69  
13  
14 6 17 Colquhoun HL, Levac D, O'Brien KK, *et al*. Scoping reviews: time for clarity in  
15  
16 definition, methods, and reporting. *J Clin Epidemiol* 2014;**67**:1291–4.  
17  
18 doi:10.1016/j.jclinepi.2014.03.013  
19  
20 8  
21 9 18 Shamseer L, Moher D, Clarke M, *et al*. Preferred reporting items for systematic  
22  
23 review and meta-analysis protocols (PRISMA-P) 2015: elaboration and explanation.  
24  
25 *BMJ* 2015;**350**:g7647. doi: 10.1136/bmj.g7647  
26  
27  
28 12 19 World Health Organization. *Defining Sexual Health: Report of technical*  
29  
30 *consultation on sexual health 28-31 January 2002*. Geneva, Switzerland: World  
31  
32 Health Organization, 2006  
33  
34 15 20 Kramer MS, Kakuma R. *The optimal duration of exclusive breastfeeding*. Geneva,  
35  
36 Switzerland: World Health Organization, 2001  
37  
38 17 21 Butte NF, López-Alarcón MG, Garza C, *et al*. *Nutrient adequacy of exclusive*  
39  
40 *breastfeeding for the term infant during the first six months of life*. Geneva,  
41  
42 Switzerland: World Health Organization, 2001  
43  
44  
45 20 22 Moher D, Liberati A, Tetzlaff J, *et al*. Preferred reporting items for systematic reviews  
46  
47 and meta-analyses: the PRISMA statement. *PLoS Med* 2009;**6**:e1000097.  
48  
49 doi:10.1371/journal.pmed.1000097.  
50  
51  
52  
53 23 23 Buscemi N, Hartling L, Vandermeer B, *et al*. Single data extraction generated more  
54  
55  
56  
57  
58  
59  
60



- 1 errors than double data extraction in systematic reviews. *J Clin Epidemiol*  
2  
3 1  
4 2006;**59**:697–703. doi:10.1016/j.jclinepi.2005.11.010  
5 2  
6 2006;**59**:697–703. doi:10.1016/j.jclinepi.2005.11.010  
7 3 24  
8 Cochrane Consumer and Communication Review Group. Data extraction template.  
9  
10 4  
11 Cochrane. 2015. Available from: [http://cccr.org.cochrane.org/author-resources](http://cccr.org/cochrane.org/author-resources).  
12 5  
13 (accessed 6 March 2018).  
14 6 25  
15 Pace R, Pluye P, Bartlett G, *et al*. Testing the reliability and efficiency of the pilot  
16  
17 7  
18 Mixed Methods Appraisal Tool (MMAT) for systematic mixed studies review. *Int J*  
19 8  
20 *Nurs Stud* 2012;**49**:47–53. doi:10.1016/j.ijnurstu.2011.07.002  
21 9 26  
22 Braun V, Clarke V. Using thematic analysis in psychology. *Qual Res Psychol*  
23  
24 10  
25 2006;**3**:77–101. doi:10.1191/1478088706qp063oa  
26 11

**PRISMA-P (Preferred Reporting Items for Systematic review and Meta-Analysis Protocols) 2015 checklist: recommended items to address in a systematic review protocol\***

| Section and topic                 | Item No | Checklist item                                                                                                                                                                                                                | Information report |    | Justification  | Line number(s) |
|-----------------------------------|---------|-------------------------------------------------------------------------------------------------------------------------------------------------------------------------------------------------------------------------------|--------------------|----|----------------|----------------|
|                                   |         |                                                                                                                                                                                                                               | Yes                | No |                |                |
| <b>ADMINISTRATIVE INFORMATION</b> |         |                                                                                                                                                                                                                               |                    |    |                |                |
| Title:                            |         |                                                                                                                                                                                                                               |                    |    |                |                |
| Identification                    | 1a      | Identify the report as a protocol of a systematic review                                                                                                                                                                      |                    | X  | Not applicable |                |
| Update                            | 1b      | If the protocol is for an update of a previous systematic review, identify as such                                                                                                                                            |                    | X  | Not applicable |                |
| Registration                      | 2       | If registered, provide the name of the registry (such as PROSPERO) and registration number                                                                                                                                    |                    | X  | Not applicable |                |
| Authors:                          |         |                                                                                                                                                                                                                               |                    |    |                |                |
| Contact                           | 3a      | Provide name, institutional affiliation, e-mail address of all protocol authors; provide physical mailing address of corresponding author                                                                                     | X                  |    |                | p.1, 1.6--26   |
| Contributions                     | 3b      | Describe contributions of protocol authors and identify the guarantor of the review                                                                                                                                           | X                  |    |                | p.11, 1.2-12   |
| Amendments                        | 4       | If the protocol represents an amendment of a previously completed or published protocol, identify as such and list changes; otherwise, state plan for documenting important protocol amendments                               |                    | X  | Not applicable |                |
| Support:                          |         |                                                                                                                                                                                                                               |                    |    |                |                |
| Sources                           | 5a      | Indicate sources of financial or other support for the review                                                                                                                                                                 | X                  |    |                | p.12, 1.4-7    |
| Sponsor                           | 5b      | Provide name for the review funder and/or sponsor                                                                                                                                                                             | X                  |    |                | p.12, 1.4-7    |
| Role of sponsor or funder         | 5c      | Describe roles of funder(s), sponsor(s), and/or institution(s), if any, in developing the protocol                                                                                                                            | X                  |    |                | p.12, 1.4-7    |
| <b>INTRODUCTION</b>               |         |                                                                                                                                                                                                                               |                    |    |                |                |
| Rationale                         | 6       | Describe the rationale for the review in the context of what is already known                                                                                                                                                 | X                  |    |                | p.3, 1.1-21    |
| Objectives                        | 7       | Provide an explicit statement of the question(s) the review will address with reference to participants, interventions, comparators, and outcomes (PICO)                                                                      | X                  |    |                | p.3, 1.22-24   |
| <b>METHODS</b>                    |         |                                                                                                                                                                                                                               |                    |    |                |                |
| Eligibility criteria              | 8       | Specify the study characteristics (such as PICO, study design, setting, time frame) and report characteristics (such as years considered, language, publication status) to be used as criteria for eligibility for the review | X                  |    |                | p.5, 1.5-119   |

|                                    |     |                                                                                                                                                                                                                                                  |   |   |                             |
|------------------------------------|-----|--------------------------------------------------------------------------------------------------------------------------------------------------------------------------------------------------------------------------------------------------|---|---|-----------------------------|
| Information sources                | 9   | Describe all intended information sources (such as electronic databases, contact with study authors, trial registers or other grey literature sources) with planned dates of coverage                                                            | X |   | p.6, l.4-8                  |
| Search strategy                    | 10  | Present draft of search strategy to be used for at least one electronic database, including planned limits, such that it could be repeated                                                                                                       | X |   | p.5, l. 8-13<br>p.6, l.1-3  |
| Study records:                     |     |                                                                                                                                                                                                                                                  |   |   |                             |
| Data management                    | 11a | Describe the mechanism(s) that will be used to manage records and data throughout the review                                                                                                                                                     | X |   | p.6, l.11-17                |
| Selection process                  | 11b | State the process that will be used for selecting studies (such as two independent reviewers) through each phase of the review (that is, screening, eligibility and inclusion in meta-analysis)                                                  | X |   | p.6, l.18-23<br>p.7, l. 1-4 |
| Data collection process            | 11c | Describe planned method of extracting data from reports (such as piloting forms, done independently, in duplicate), any processes for obtaining and confirming data from investigators                                                           | X |   | p.7, l.22-23<br>p.8, l.1-7  |
| Data items                         | 12  | List and define all variables for which data will be sought (such as PICO items, funding sources), any pre-planned data assumptions and simplifications                                                                                          | X |   | p.9, l.6-19                 |
| Outcomes and prioritization        | 13  | List and define all outcomes for which data will be sought, including prioritization of main and additional outcomes, with rationale                                                                                                             |   | X | Not applicable              |
| Risk of bias in individual studies | 14  | Describe anticipated methods for assessing risk of bias of individual studies, including whether this will be done at the outcome or study level, or both; state how this information will be used in data synthesis                             | X |   | p.8, l.18-24<br>p.9, l.1-3  |
| Data synthesis                     | 15a | Describe criteria under which study data will be quantitatively synthesised                                                                                                                                                                      | X |   | p.9, l.5-11                 |
|                                    | 15b | If data are appropriate for quantitative synthesis, describe planned summary measures, methods of handling data and methods of combining data from studies, including any planned exploration of consistency (such as $I^2$ , Kendall's $\tau$ ) | X |   | p.9, l. 12-14               |
|                                    | 15c | Describe any proposed additional analyses (such as sensitivity or subgroup analyses, meta-regression)                                                                                                                                            |   | X | Not applicable              |
|                                    | 15d | If quantitative synthesis is not appropriate, describe the type of summary planned                                                                                                                                                               | X |   | p.9, l.15-19                |
| Meta-bias(es)                      | 16  | Specify any planned assessment of meta-bias(es) (such as publication bias across studies, selective reporting within studies)                                                                                                                    |   | X | Not applicable              |
| Confidence in cumulative evidence  | 17  | Describe how the strength of the body of evidence will be assessed (such as GRADE)                                                                                                                                                               |   | X | Not applicable              |

**\* It is strongly recommended that this checklist be read in conjunction with the PRISMA-P Explanation and Elaboration (cite when available) for important clarification on the items. Amendments to a review protocol should be tracked and dated. The copyright for PRISMA-P (including checklist) is held by the PRISMA-P Group and is distributed under a Creative Commons Attribution Licence 4.0.**

1  
2  
3  
4 From: Shamseer L, Moher D, Clarke M, Ghersi D, Liberati A, Petticrew M, Shekelle P, Stewart L, PRISMA-P Group. Preferred reporting items for systematic review and  
5 meta-analysis protocols (PRISMA-P) 2015: elaboration and explanation. *BMJ*. 2015 Jan 2;349(jan02 1):g7647.  
6  
7  
8  
9  
10  
11  
12  
13  
14  
15  
16  
17  
18  
19  
20  
21  
22  
23  
24  
25  
26  
27  
28  
29  
30  
31  
32  
33  
34  
35  
36  
37  
38  
39  
40  
41  
42  
43  
44  
45  
46

For peer review only

## Supplementary file 2

### Search strategy

Search: PubMed strategy

1. "Breast Feeding"[Mesh]
2. "Lactation"[Mesh]
3. "Postpartum Period"[Mesh]
4. "Lactation"
5. "Breast Feeding"
6. "Postpartum Period"
7. OR/1-6
8. "Sexuality"[Mesh]
9. "Sexual Behavior"[Mesh]
10. "Sexual Partners"[Mesh]
11. "Sexuality"
12. "Sexual Behavior"
13. "Sexual Partners"
14. OR/8-13
15. "Sexual Dysfunction, Physiological"[Mesh]
16. "Sexual Dysfunctions, Psychological"[Mesh]
17. "Sexual Dysfunction, Female"
18. "Psychosexual Disorders"
19. "Sexual Dysfunction, Physiological"
20. "Physiological Sexual Dysfunction"
21. "Physiological Sexual Dysfunctions"
22. "Sexual Dysfunctions, Physiological"
23. "Sexual Disorders, Physiological"
24. "Physiological Sexual Disorder"
25. "Physiological Sexual Disorders"
26. "Sexual Disorder, Physiological"
27. "Sex Disorders"
28. "Sexual Dysfunctions, Psychological"
29. "Dysfunction, Psychological Sexual"

- 1
- 2
- 3 30. "Dysfunctions, Psychological Sexual"
- 4 31. "Psychological Sexual Dysfunction"
- 5 32. "Psychological Sexual Dysfunctions"
- 6 33. "Sexual Dysfunction, Psychological"
- 7 34. "Psychosexual Dysfunctions"
- 8 35. "Dysfunction, Psychosexual"
- 9 36. "Dysfunctions, Psychosexual"
- 10 37. "Psychosexual Dysfunction"
- 11 38. "Psychosexual Disorders"
- 12 39. "Disorder, Psychosexual"
- 13 40. "Disorders, Psychosexual"
- 14 41. "Psychosexual Disorder"
- 15 42. "Hypoactive Sexual Desire Disorder"
- 16 43. "Sexual Aversion Disorder"
- 17 44. "Aversion Disorders, Sexual"
- 18 45. "Disorders, Sexual Aversion"
- 19 46. "Sexual Aversion Disorders"
- 20 47. "Orgasmic Disorder"
- 21 48. "Disorders, Orgasmic"
- 22 49. "Orgasmic Disorders"
- 23 50. "Sexual Arousal Disorder"
- 24 51. "Arousal Disorders, Sexual"
- 25 52. "Disorders, Sexual Arousal"
- 26 53. "Sexual Arousal Disorders"
- 27 54. "Frigidity"
- 28 55. OR/15-54
- 29 56. 7 AND 14 AND 55
- 30
- 31
- 32
- 33
- 34
- 35
- 36
- 37
- 38
- 39
- 40
- 41
- 42
- 43
- 44
- 45
- 46
- 47
- 48
- 49
- 50
- 51
- 52
- 53
- 54
- 55
- 56
- 57
- 58
- 59
- 60

Figure 1 PRISMA Flow Diagram

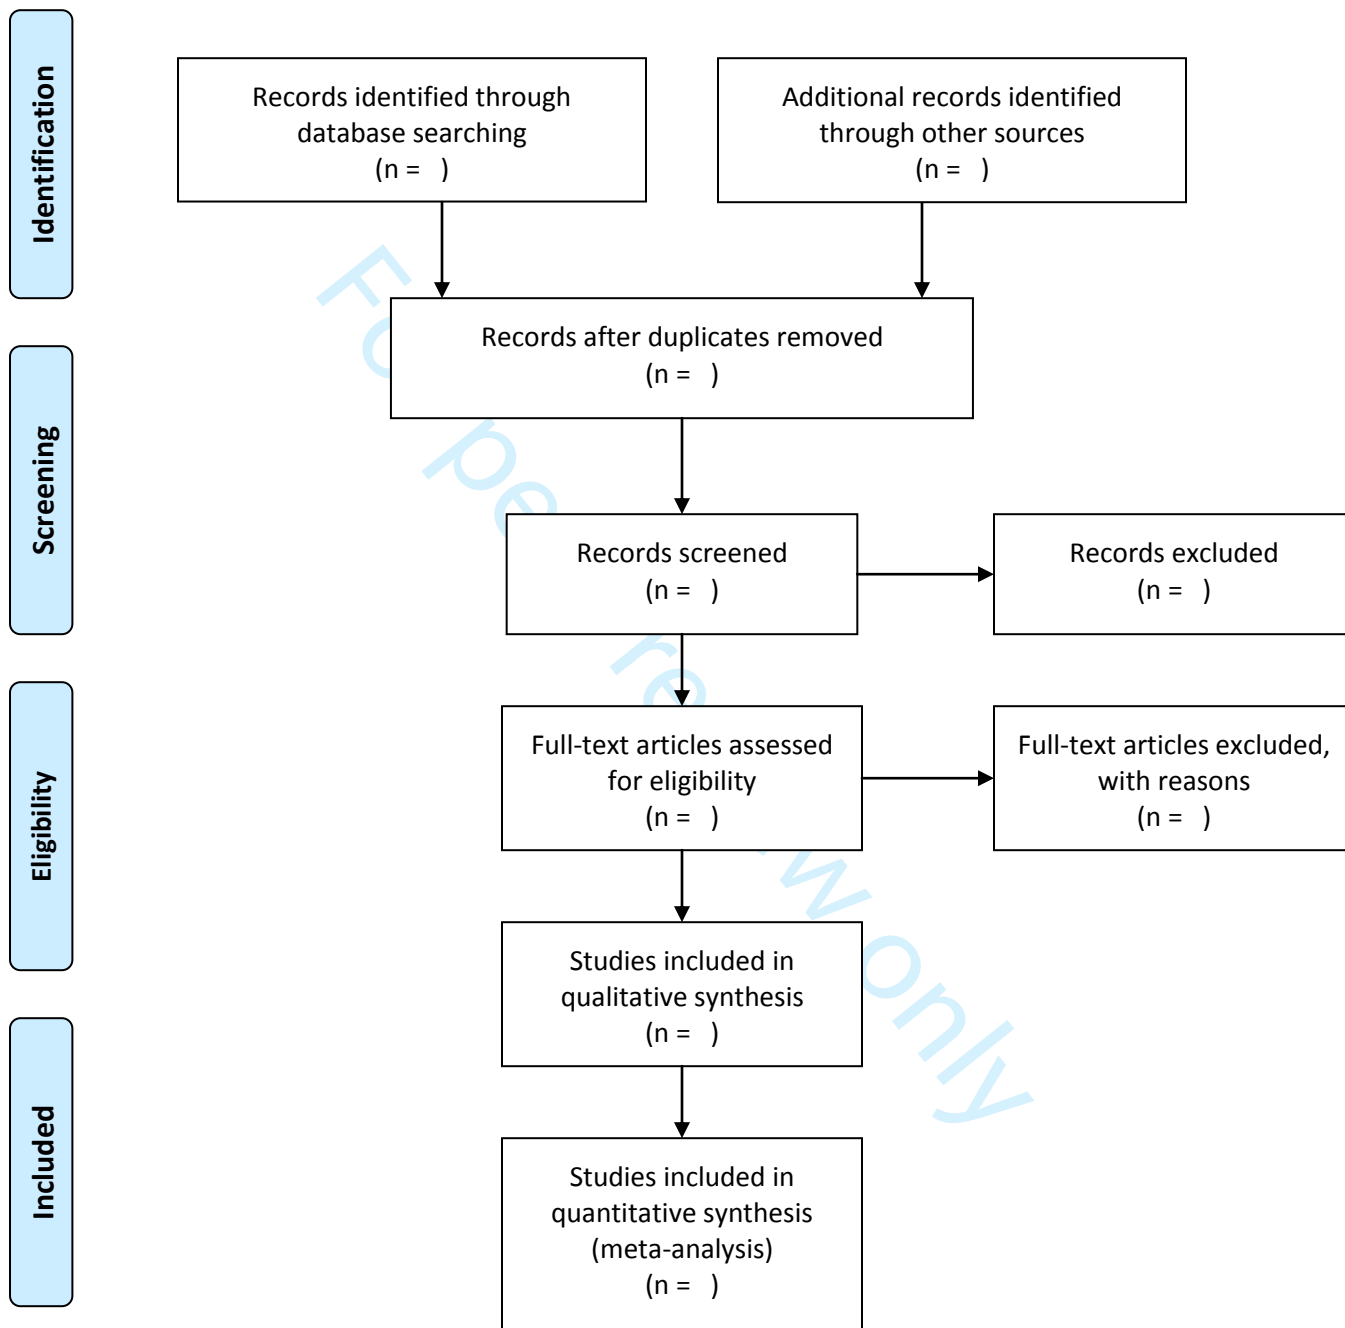

**Supplementary file 4**  
**Data collection form**

|                                    |                                                                                                                                                                                                                                                                                                                                                                                                               |
|------------------------------------|---------------------------------------------------------------------------------------------------------------------------------------------------------------------------------------------------------------------------------------------------------------------------------------------------------------------------------------------------------------------------------------------------------------|
| Title of review                    | Factors that contributing to development of the sexual dysfunction in nursing women: A Systematic Scoping Review Protocol                                                                                                                                                                                                                                                                                     |
| Reviewer                           |                                                                                                                                                                                                                                                                                                                                                                                                               |
| Date of review                     |                                                                                                                                                                                                                                                                                                                                                                                                               |
| Form version                       |                                                                                                                                                                                                                                                                                                                                                                                                               |
| Contact with author                | Date, reason, resolved                                                                                                                                                                                                                                                                                                                                                                                        |
| Notes                              |                                                                                                                                                                                                                                                                                                                                                                                                               |
| Study identification               |                                                                                                                                                                                                                                                                                                                                                                                                               |
| Report number                      | Last name first author-year of the reference                                                                                                                                                                                                                                                                                                                                                                  |
| Study number                       | Last name first author-year of the primary reference                                                                                                                                                                                                                                                                                                                                                          |
| Title                              | Author(s)                                                                                                                                                                                                                                                                                                                                                                                                     |
|                                    | Source<br><input type="checkbox"/> research article <input type="checkbox"/> abstract <input type="checkbox"/> conference proceeding<br><input type="checkbox"/> non-research article <input type="checkbox"/> review <input type="checkbox"/> guideline<br><input type="checkbox"/> recommendation other (eg. Unpublished date)                                                                              |
| Source 2                           | <input type="checkbox"/> PubMed <input type="checkbox"/> Excerpta Medica Database (EMBASE)<br><input type="checkbox"/> Cumulative Index to Nursing and Allied Health Literature (CINAHL) <input type="checkbox"/> PsycINFO <input type="checkbox"/> Science Direct<br><input type="checkbox"/> Web of Science <input type="checkbox"/> Google Scholar                                                         |
| Year                               |                                                                                                                                                                                                                                                                                                                                                                                                               |
| Volume                             |                                                                                                                                                                                                                                                                                                                                                                                                               |
| Page (start-end)                   |                                                                                                                                                                                                                                                                                                                                                                                                               |
| Contact                            |                                                                                                                                                                                                                                                                                                                                                                                                               |
| Country                            |                                                                                                                                                                                                                                                                                                                                                                                                               |
| Language                           |                                                                                                                                                                                                                                                                                                                                                                                                               |
| Funding                            |                                                                                                                                                                                                                                                                                                                                                                                                               |
| Notes                              |                                                                                                                                                                                                                                                                                                                                                                                                               |
| Eligibility of study in the review |                                                                                                                                                                                                                                                                                                                                                                                                               |
| Inclusion criteria                 | Literature in English, Spanish and Portuguese focused on one or more three research questions.<br>Original studies of qualitative or quantitative approach; literature review independent of the method used; communications.<br>Gray literature, annals of congresses, conferences, organizations societies; academic dissertations, theses conference, books, chapters of books and governmental documents. |
| Notes                              |                                                                                                                                                                                                                                                                                                                                                                                                               |
| Study details                      |                                                                                                                                                                                                                                                                                                                                                                                                               |



|                                                                  |                                                                                                                        |
|------------------------------------------------------------------|------------------------------------------------------------------------------------------------------------------------|
| Setting                                                          | Country(ies)/province(s)/state(s)                                                                                      |
| Period of study                                                  | Dates start-end                                                                                                        |
| Study exclusion criteria                                         | Studies focusing on the sexuality of pregnant women and reports with partial or inconsistent results will be excluded. |
| REB approval                                                     | <input type="checkbox"/> yes <input type="checkbox"/> no <input type="checkbox"/> unclear                              |
| Study design                                                     |                                                                                                                        |
| Primary data source                                              |                                                                                                                        |
| Secondary data source                                            |                                                                                                                        |
| Other data sources                                               |                                                                                                                        |
| Notes                                                            |                                                                                                                        |
| Population characteristics                                       |                                                                                                                        |
| Sample size (n)                                                  | Patients:                                                                                                              |
| Age                                                              | e.g. n(%), mean (SD), median (quartiles)                                                                               |
| Sexual behaviors of nursing women                                |                                                                                                                        |
| Aspects related to sexuality in nursing women                    |                                                                                                                        |
| Types of sexual dysfunction of the nursing women                 |                                                                                                                        |
| Factors that contributing to sexual dysfunction in nursing women |                                                                                                                        |

\*Adapted from Cochrane Consumer and Communication Review Group Data extraction template.



# BMJ Open

## What are the factors that contribute to the development of sexual dysfunction in breastfeeding women? A systematic scoping review protocol

|                                 |                                                                                                                                                                                                                                                                                                                                                                                                                                                                                                                                                                                                                                                                                                                                                                                                                                                                                                                                                                                                                                                                                                                                                                                                                                              |
|---------------------------------|----------------------------------------------------------------------------------------------------------------------------------------------------------------------------------------------------------------------------------------------------------------------------------------------------------------------------------------------------------------------------------------------------------------------------------------------------------------------------------------------------------------------------------------------------------------------------------------------------------------------------------------------------------------------------------------------------------------------------------------------------------------------------------------------------------------------------------------------------------------------------------------------------------------------------------------------------------------------------------------------------------------------------------------------------------------------------------------------------------------------------------------------------------------------------------------------------------------------------------------------|
| Journal:                        | <i>BMJ Open</i>                                                                                                                                                                                                                                                                                                                                                                                                                                                                                                                                                                                                                                                                                                                                                                                                                                                                                                                                                                                                                                                                                                                                                                                                                              |
| Manuscript ID                   | bmjopen-2018-022863.R1                                                                                                                                                                                                                                                                                                                                                                                                                                                                                                                                                                                                                                                                                                                                                                                                                                                                                                                                                                                                                                                                                                                                                                                                                       |
| Article Type:                   | Protocol                                                                                                                                                                                                                                                                                                                                                                                                                                                                                                                                                                                                                                                                                                                                                                                                                                                                                                                                                                                                                                                                                                                                                                                                                                     |
| Date Submitted by the Author:   | 23-Jun-2018                                                                                                                                                                                                                                                                                                                                                                                                                                                                                                                                                                                                                                                                                                                                                                                                                                                                                                                                                                                                                                                                                                                                                                                                                                  |
| Complete List of Authors:       | Fuentealba-Torres, Miguel; University of São Paulo, Department of Maternal-Infant and Public Health Nursing;<br>Cartagena-Ramos, Denisse ; University of São Paulo, Department of Maternal-Infant and Public Health Nursing<br>Sierra, JC; University of Granada, Department of Personality, Evaluation and Psychological Treatment<br>Lara, Lúcia ; University of São Paulo, Department of Gynecology and Obstetrics<br>Okano, Sérgio; University of São Paulo, Department of Gynecology and Obstetrics<br>Berra, Thaís; University of São Paulo, Department of Maternal-Infant and Public Health Nursing<br>Alves, Luana; University of São Paulo, Department of Maternal-Infant and Public Health Nursing<br>Leite, Ana Carolina; University of São Paulo, Department of Maternal-Infant and Public Health Nursing<br>Yamamura, Mellina; University of São Paulo, Department of Maternal-Infant and Public Health Nursing<br>Silva, Isília; University of São Paulo, Department of Maternal-Infant and Psychiatric Nursing<br>Nascimento, Lucila; University of São Paulo, Department of Maternal-Infant and Public Health Nursing<br>Arcêncio, Ricardo; University of São Paulo, Department of Maternal-Infant and Public Health Nursing |
| <b>Primary Subject Heading</b>: | Obstetrics and gynaecology                                                                                                                                                                                                                                                                                                                                                                                                                                                                                                                                                                                                                                                                                                                                                                                                                                                                                                                                                                                                                                                                                                                                                                                                                   |
| Secondary Subject Heading:      | Obstetrics and gynaecology, Sexual health                                                                                                                                                                                                                                                                                                                                                                                                                                                                                                                                                                                                                                                                                                                                                                                                                                                                                                                                                                                                                                                                                                                                                                                                    |
| Keywords:                       | Breast Feeding, Physiological Sexual Dysfunction, Psychological Sexual Dysfunction, Sexual Behavior, Sexual Health                                                                                                                                                                                                                                                                                                                                                                                                                                                                                                                                                                                                                                                                                                                                                                                                                                                                                                                                                                                                                                                                                                                           |
|                                 |                                                                                                                                                                                                                                                                                                                                                                                                                                                                                                                                                                                                                                                                                                                                                                                                                                                                                                                                                                                                                                                                                                                                                                                                                                              |

SCHOLARONE™  
Manuscripts

1  
2  
3 1 **What are the factors that contribute to the development of sexual dysfunction in**  
4  
5 2 **breastfeeding women? A systematic scoping review protocol**

6  
7  
8 3 Miguel Fuentealba-Torres 1, Denisse Cartagena-Ramos 1, Juan Carlos Sierra 2,  
9  
10 4 Lúcia Alves Lara 3, Sérgio Pires Okano 3, Thaís Zamboni Berra 1, Luana Seles  
11  
12 5 Alves 1, Ana Carolina Andrade Biaggi Leite 1, Mellina Yamamura 1, Isília  
13  
14 6 Aparecida Silva 4, Lucila Castanheira Nascimento 1, Ricardo Alexandre Arcêncio 1.  
15

16  
17  
18 8 **Author affiliations**

19  
20 9 1 Departament of Maternal-Infant and Public Health Nursing, University of São  
21  
22 10 Paulo, Ribeirão Preto, Brazil.  
23  
24 11 2 Centro de Investigación Mente, Cerebro y Comportamiento (CIMCYC), University  
25  
26 12 of Granada, Granada, Spain.  
27  
28 13 3 Departament of Gynecology and Obstetrics, University of São Paulo, Ribeirão  
29  
30 14 Preto, Brazil.  
31  
32 15 4 Departament of Maternal-Infant and Psychiatric Nursing, University of São Paulo,  
33  
34 16 São Paulo, Brazil.  
35  
36  
37

38 17 **Corresponding author:**

39  
40 18 Miguel Fuentealba-Torres, Collage of Nursing at Ribeirão Preto, University of São  
41  
42 19 Paulo, Brazil.

43  
44 20 Full mailing address: Avenida Bandeirantes, 3900. Ribeirão Preto. São Paulo State –  
45  
46 21 Brazil. Zip code: 14040-902. Telephone: +55 16 3315-3435

47  
48 22 e-mail: [mfuentealba@usp.br](mailto:mfuentealba@usp.br)  
49  
50

51  
52  
53 24 **Keywords:** Breast Feeding, Physiological Sexual Dysfunction, Psychological Sexual  
54  
55 25 Dysfunction, Sexual Behavior, Sexual Health  
56  
57  
58  
59

1  
2  
3 **1 ABSTRACT**  
4

5 **2 Introduction:** Female Sexual Dysfunction constitutes a public health problem.  
6

7  
8 Evidence indicates that the population of nursing women is more vulnerable to the  
9  
10 phenomenon due to breastfeeding. Thus, this protocol was developed to explore the  
11  
12 factors that contribute to the development of sexual dysfunction in breastfeeding  
13  
14 women.  
15

16 **7 Methods and analysis:** The systematic scoping review will be conducted in six stages,  
17  
18 according to the PRISMA-P. The databases used will be: PubMed, Excerpta Medica  
19  
20 Database (EMBASE), Cumulative Index to Nursing and Allied Health Literature  
21  
22 (CINAHL), PsycINFO, Science Direct, Web of Science and Google Scholar. The  
23  
24 searches were made until June 01, 2018 and no retrospective time limit was used. For  
25  
26 the organization of the literature retrieved from the databases, the EndNote Basic  
27  
28 manager will be used. The Cochrane model will be used for the data extraction. The  
29  
30 analysis of the quantitative data will be carried out through descriptive statistics and the  
31  
32 qualitative data will be submitted to thematic analysis. The methodological quality of  
33  
34 the empirical studies will be evaluated using the Mixed Methods Appraisal Tool  
35  
36 (MMAT).  
37  
38

39  
40 **18 Ethics and dissemination:** As it will be a review study, without human involvement,  
41  
42 there will be no need for ethical approval. The results will be disseminated in a  
43  
44 scientific journal, as well as in various media, such as: conferences, seminars,  
45  
46 congresses or symposia.  
47

48  
49 **22 Strengths and limitations of this study:**  
50

51 ➤ This protocol reduces the possibility of duplication, gives transparency to the  
52  
53 methods and processes that will be used, reduces possible biases and allows peer  
54  
55 review.  
56  
57  
58  
59  
60

- 1  
2  
3 1 ➤ This scoping review will be the first to explore of the factors that contribute to  
4 the development of sexual dysfunction in breastfeeding women.  
5  
6  
7 3 ➤ The scarcity of empirical studies, the publication bias and the methodological  
8 quality of the gray literature found may be the main limitations of the study.  
9  
10

11 **Keywords:** Breast Feeding, Physiological Sexual Dysfunction, Psychological Sexual  
12 Dysfunction, Sexual Behavior, Sexual Health  
13  
14

## 15 16 7 INTRODUCTION

17  
18  
19 8 Sexual dysfunctions are a heterogeneous group of disorders, which affects the capacity  
20 for sexual response or sexual pleasure.<sup>1</sup> These disorders have been related to biological,  
21 psychological, cultural, behavioral and interpersonal determinants.<sup>2</sup>  
22  
23  
24

25  
26  
27 11 Female Sexual Dysfunction (FSD) is considered a public health problem, affecting  
28 more than 40% of the world population of women.<sup>3</sup> A systematic review estimated that  
29 the prevalence of FSD in populations over 18 years of age ranges from 5.5% to 73.2%<sup>4</sup>  
30 and a meta-analysis estimated that the prevalence of sexual dysfunction among middle-  
31 aged women age is 40.9%.<sup>5</sup>  
32  
33  
34  
35  
36  
37

38 16 The literature evidenced that women who breastfeed may have a higher risk of sexual  
39 dysfunction.<sup>4-8</sup> Hyperprolactinemia, hypoestrogenism and the demand for infant care  
40 may increase female sexual dysfunctions in this period.<sup>7-12</sup> Despite this evidences, few  
41 studies have been conducted to identify factors that contribute to the development of  
42 FSD among breastfeeding women.<sup>13,14</sup>  
43  
44  
45  
46  
47  
48  
49

50 21 Previous studies have investigated sexual dysfunction in the puerperium.<sup>9,13,15,16</sup>  
51  
52 22 However, most of these studies combine populations of women who are breastfeeding  
53 with populations of women who do not breastfeed. This analyzed has not allowed to  
54 identify specific risk factors for FSD in women who breastfeed.  
55  
56  
57  
58  
59  
60

1  
2  
3 1 Due to the scarcity of epidemiological studies of FSD in these women, the real  
4  
5 2 prevalences and risk factors for FSD in this population are still unknown. This panorama  
6  
7 3 has made it impossible, at present, to conduct classic systematic reviews. In spite of this  
8  
9 4 situation, it is possible to identify factors that contribute to the FSD of women who  
10  
11 5 breastfeed between gray literature, book chapters, studies in development and research  
12  
13 6 with a diversity of designs. This study consists of a protocol of a Systematic Scoping  
14  
15 7 Review developed with the objective of exploring the factors that contribute to the  
16  
17 8 development of FSD in the population of women who breastfeed and to promote the  
18  
19 9 development of new research.  
20  
21  
22  
23  
24  
25

10

## 11 **METHODS AND ANALYSIS**

12 This work constitutes a protocol for a Systematic Scoping Review, which will be  
13 developed according to the steps proposed by Arksey and O'Malley<sup>17</sup> and subsequent  
14 recommendations.<sup>18,19</sup> The six stages consist of: 1) Identifying the research question; 2)  
15 Identifying relevant studies; 3) Study selection; 4) Charting the data 5) Collating,  
16 summarizing, and reporting results; and 6) Consultation.<sup>17,18</sup>

17 This protocol follows the PRISMA-P guidelines (Supplementary file 1) for the  
18 bibliographic search process.<sup>20</sup> Currently, this research is in the second stage, which  
19 consists of identifying the relevant studies.

### 20 **1. Identifying the research question**

21 The research questions were discussed by the authors and, from a consensus, three  
22 research questions were elaborated, articulated for the purpose of the review. The  
23 questions were broad in nature and structured from three components: 1) the definition

1 of the concept to be researched, 2) the target population and 3) the results of interest in  
 2 health.<sup>18</sup> (Table 1)

3 Table 1 Structure of the research questions of the systematic scoping review protocol

| Questions                                                                                                         | Concept                             | Target population   | Results of interest in health                                               |
|-------------------------------------------------------------------------------------------------------------------|-------------------------------------|---------------------|-----------------------------------------------------------------------------|
| What happens to female sexual performance in the course of breastfeeding?                                         | Female sexual performance           | Breastfeeding women | Female sexual performance in the course of breastfeeding                    |
| What are the biological and psychosocial aspects that interfere with the sexual function of women who breastfeed? | Biological and psychosocial aspects | Breastfeeding women | Biological and psychosocial aspects that interfere with the sexual function |
| What are the sexual dysfunction problems in breastfeeding women?                                                  | Sexual dysfunction problems         | Breastfeeding women | The types of sexual dysfunction problems                                    |

4

5 In this step, the concepts and their definitions to be used to support the questions of this  
 6 review were also determined. (Table 2)

7 Table 2 Key concepts and definitions pertaining to the study questions

| Concept | Definition |
|---------|------------|
|         |            |



---

|                                                                               |                                   |                                                                                                                                                                                                                                                                                                                                               |
|-------------------------------------------------------------------------------|-----------------------------------|-----------------------------------------------------------------------------------------------------------------------------------------------------------------------------------------------------------------------------------------------------------------------------------------------------------------------------------------------|
| 1<br>2<br>3<br>4<br>5<br>6<br>7<br>8<br>9<br>10<br>11<br>12<br>13<br>14<br>15 | Breastfeeding women               | Breastfeeding is when the child receives breastmilk directly from the breasts and the following types are considered: exclusive breastfeeding (only breastfeeding), predominant breastfeeding (breastfeeding in combination with fluids), complementary breastfeeding (breastfeeding in combination with solids or semi-solid). <sup>21</sup> |
| 16<br>17<br>18<br>19<br>20<br>21<br>22<br>23                                  | Sexuality                         | This involved a broad perspective with some conceptual elements of the WHO definition. <sup>22</sup> In which biological and psychosocial aspects are considered.                                                                                                                                                                             |
| 24<br>25<br>26<br>27<br>28                                                    | Biological aspects                | Consider the interaction of prolactin and oxytocin with female sex hormones including estrogen and progesterone.                                                                                                                                                                                                                              |
| 29<br>30<br>31<br>32<br>33<br>34<br>35                                        | Psychosocial aspects of sexuality | It considers the intrapsychic and social aspects of the sexual response of women who breastfeed, including depression, body image, fatigue, sleep deprivation and parental tasks.                                                                                                                                                             |
| 36<br>37<br>38<br>39<br>40<br>41<br>42<br>43<br>44                            | Female sexual performance         | It is a component of sexual behavior that is a consequence of the interrelation between hormonal actions in the brain, sexual arousal and expectations of sexual competence that results in the performance of the individual. <sup>23</sup>                                                                                                  |
| 45<br>46<br>47<br>48<br>49<br>50<br>51<br>52<br>53<br>54<br>55<br>56          | Sexual dysfunction                | Involves a group of disorders that are typically characterized by clinically significant disorders in a person's ability to respond sexually or experience sexual pleasure. <sup>1</sup> These disorders affect the dimensions of desire, excitement, lubrication, orgasm, satisfaction and pain. <sup>24</sup>                               |

---

1

## 2 **Identification of relevant studies**

### 3 **Search Strategy**

4 The search strategies were articulated with the research questions and were developed  
5 by a team of librarians and researchers with experience in bibliographic searches in  
6 databases of the health area. The searches were made until June 01, 2018 and no  
7 retrospective time limit was used. The controlled vocabulary terms from the MeSH,  
8 APA Thesaurus, CINAHL Subject Headings and Entree Thesaurus were used in  
9 combination with keywords and the Boolean operators AND and OR. The search  
10 strategies were adapted according to the specificities of each database. The filters used  
11 were: literature with humans; in the Spanish; Portuguese or English languages; without  
12 time limit or restrictions according to the type of study (Supplementary file 2).

13 The following multidisciplinary and health sciences electronic databases were used:  
14 PubMed, Excerpta Medica Database (EMBASE), Cumulative Index to Nursing and  
15 Allied Health Literature (CINAHL), PsycINFO, Science Direct, plus Google Scholar in  
16 the search for gray literature. In addition, studies will be identified through the  
17 references of the studies retrieved in the databases and selected for the review.

### 18 **Study Selection**

19 The selection process will be presented through the flow diagram Preferred Reporting  
20 Items for Systematic and Meta-Analyses (PRISMA), according to the steps: 1)  
21 identification; 2) screening; 3) eligibility and 4) inclusion.<sup>25</sup> (Supplementary file 3).

22 In the identification stage of the literature retrieved, all studies will be organized with  
23 the help of the EndNote Basic program, which manages the organization, storage,

1 identification and removal of duplicate studies. Then the references will be exported to a  
2 database constructed using Microsoft Excel, version 2016.

3 In the screening stage, the pre-selection of potentially eligible literature will be  
4 performed. In order to reduce possible bias in this step, independent reading of the titles  
5 and abstracts of the pre-selected studies will be performed independently by two  
6 reviewers (DCR and MFT). Using the SPSS version 23.0 software, the inter-observer  
7 agreement index between the reviewers DCR and MFT, using the Kappa criterion >80%  
8 ( $p < 0.05$ )<sup>26</sup> will be calculated. In case of disagreement in the selection of the studies, a  
9 third reviewer (RA) will be consulted.

10 The eligibility stage will be developed by a team of two reviewers (MFT and DCR). To  
11 avoid possible biases, the reviewers will independently and comprehensively read the  
12 literature pre-selected in the screening stage. In case of disagreement, a third reviewer  
13 (RA) will be consulted.

14 To evaluate the inclusion or exclusion of eligible studies, reviewers will use the  
15 following criteria:

16 **Inclusion criteria:**

- 17 1. Literature in English, Spanish or Portuguese, focused on the research questions  
18 detailed in table 1.
- 19 2. Literature focusing on sexual dysfunction in the nursing population, including:  
20 qualitative or quantitative empirical studies; studies of literature review, regardless of  
21 the method used; and brief communications of ongoing studies.

1  
2  
3 1 3. Gray literature focusing on sexual dysfunction in the nursing population,  
4  
5 2 including: annals of congresses, conferences of organizations or societies; academic  
6  
7 3 dissertations, theses, books, book chapters, and government documents.  
8  
9

10 4 4. Cohort studies focusing on the sexual function of nutritious women, who have  
11  
12 5 followed up from pregnancy to post-partum, will also be included.  
13  
14

#### 15 6 **Exclusion criteria:**

16  
17  
18 7 Studies focusing on the sexuality of pregnant women and brief communications with  
19  
20 8 inconsistent results will be excluded.  
21  
22

#### 23 9 **Patient and Public Involvement**

24  
25  
26 10 There was no participation of patients in this study.  
27  
28

#### 29 11 **Charting the data (extraction of the data)**

30  
31  
32 12 In this step, the data will be extracted from the literature included, evaluating the quality  
33  
34 13 of the individual studies selected.  
35  
36

37 14 The following data will be extracted based on the Cochrane Consumer and  
38  
39 15 Communication Review Group Data extraction template (2015)<sup>27</sup>: database, year,  
40  
41 16 volume, pages, funding agency, country, language, title, type of study, method,  
42  
43 17 inclusion and exclusion criteria, sample, characteristics of the population, place and  
44  
45 18 period of the study. In addition, information will be extracted regarding the sexual  
46  
47 19 behaviors of women who breastfeed, the types of sexual dysfunctions and the factors  
48  
49 20 that contribute to female sexual dysfunction. (Supplementary file 4).  
50  
51  
52

#### 53 21 **Mapping of the literature included**

54  
55  
56  
57  
58  
59  
60

1  
2  
3 1 In order to visualize the geographic location of the literature included the articles will be  
4  
5 2 geocoded, through the correspondence address of the first author listed in the article.  
6  
7 3 Through the Google Earth™ Version 7.15 software, the geographic coordinates of these  
8  
9 4 addresses will be obtained and later geocoded using the TerraView version 4.2.2  
10  
11 5 software. The final file of the geocoded addresses will follow the Universal Transverse  
12  
13 6 Mercator (UTM) projection and the Geocentric Reference System for the Americas  
14  
15 7 (SIRGAS) 2000 datum. Finally, the articles included in the scoping review will be  
16  
17 8 presented on the map of the world.  
18  
19  
20

### 21 **Risk of bias (quality) assessment of individual studies**

22  
23  
24 10 To reduce possible biases, the data will be extracted by a team of six reviewers using  
25  
26 11 the standardized extraction form adapted from the Cochrane Consumer and  
27  
28 12 Communication Review Group Data extraction template (2016).<sup>27</sup> The quality of the  
29  
30 13 empirical studies included in the review will be evaluated using the Mixed Methods  
31  
32 14 Appraisal Tool (MMAT).<sup>28</sup> This instrument was developed to evaluate the  
33  
34 15 methodological quality of empirical studies included in systematic reviews, conducted  
35  
36 16 through qualitative, quantitative and mixed methods. Subsequently, the evidence of  
37  
38 17 methodological quality of the scope of the literature will be presented, including the  
39  
40 18 evidence of studies that present low scores in the quality evaluation, which will not be  
41  
42 19 excluded from the sample analyzed.  
43  
44  
45  
46  
47  
48

### 49 **Collating, summarizing, and reporting the data**

50  
51  
52 22 The selected studies will be characterized and the extracted data will be summarized to  
53  
54 23 discuss the evidence that will support possible answers to the research questions and  
55  
56 24 recommendations for future studies.  
57  
58  
59  
60

1  
2  
3 1 The characterization of the studies will cover: authors; year of publication; countries;  
4  
5 2 aim of the study; population and sample size; place of study; method; results and  
6  
7 3 evaluation of the methodological quality of empirical studies. (Supplementary file 5).

8  
9 4 For the descriptive analysis of the characteristics of the included literature, the SPSS  
10  
11 5 program is going to be applied calculating absolute frequencies and percentages.

12  
13  
14 6 The summarization of the quantitative evidence is going to carry out in a narrative form  
15  
16 7 by identification categories.

17  
18  
19 8 The summary of the qualitative evidence will be presented through the themes,  
20  
21 9 constructed from the thematic deductive analysis. The thematic analysis process will be  
22  
23 10 performed through the following steps: 1) familiarization with the data, 2) generation of  
24  
25 11 initial codes, 3) search for themes, 4) review of themes, 5) definition of the themes, and  
26  
27 12 6) articulation of the themes with the literature of the area and production of the final  
28  
29 13 analysis.<sup>29</sup>

#### 30 31 32 33 14 **Stakeholder consultation**

34  
35  
36 15 This is the final step of the review and will consist of consulting a panel of experts  
37  
38 16 regarding the clinical implications of the evidence summarized in the study.<sup>18</sup>

39  
40  
41 17 The panel will be made up of three specialists: a researcher with experience in the area  
42  
43 18 of breastfeeding; a researcher with training in psychology and with experience in the  
44  
45 19 subject of sexuality; and a medical sexologist, with experience in research into sexual  
46  
47 20 dysfunction.

48  
49  
50 21 In this procedure, a synthesis with the preliminary results of the literature will be sent to  
51  
52 22 the panel of specialists, later, two web-based conferences, approximately one hour long,  
53  
54 23 will be scheduled to develop a group discussion regarding their opinions about the

1 evidence found in the literature. In the first conference, the practical recommendations  
 2 of the evidence, dissemination strategies and guidelines for future studies will be  
 3 discussed. In the second conference, the final report of the research will be presented  
 4 which will conclude with the practical recommendations, dissemination strategies and  
 5 outlines for future studies contributed by the panel of experts at the first meeting.

## 6 **ETHICS AND DISSEMINATION**

7 As it will be a review study, without human involvement, there will be no need for  
 8 ethical approval. The results will be disseminated in a scientific journal, as well as in  
 9 various media, such as: conferences, seminars, congresses or symposia.

10 The results of the review will be disseminated in an open access journal to ensure access  
 11 for undergraduate and graduate students, researchers, academics, and research groups,  
 12 and will be disseminated at conferences aimed at students, researchers, health teams and  
 13 the community of nursing women.

14 The stages of the review will be presented in the following table.

| Stage of review at time of this submission                      | Started    | Completed  |
|-----------------------------------------------------------------|------------|------------|
| Preliminary searches                                            | 4/10/2017  | 30/11/2017 |
| Piloting of the study selection process                         | 11/12/2017 | 5/02/2018  |
| Formal screening of search results against eligibility criteria | 08/02/2018 | No         |
| Data extraction                                                 | No         | No         |

|                                   |    |    |
|-----------------------------------|----|----|
| Risk of bias (quality) assessment | No | No |
| Data analysis                     | No | No |

---

1

## 2 **Authors' Contributions**

3 As this is a review of the scope of the literature, this review is being conducted by a  
 4 team of 12 researchers. M. Fuentealba-Torres, D. Cartagena-Ramos, proposed the  
 5 development of the study and coordinated the construction of this protocol, M.  
 6 Fuentealba-Torres, D. Cartagena-Ramos, J.C Sierra, L. Lara, L. I. Silva, Nascimento  
 7 and R. Arcêncio, development the theoretical aspects of method. M. Fuentealba-Torres,  
 8 D. Cartagena-Ramos, J.C Sierra, L. Lara, S. Okano, T. Berra, L. Alves, A. Leite, M.  
 9 Yamamura, L. I. Silva, L. Nascimento and R. Arcêncio discussed, consensus of the  
 10 three research questions and articulated for the purpose of the review. M. Fuentealba-  
 11 Torres, D. Cartagena-Ramos, S. Okano, T. Berra, L. Alves, A. Leite, M. Yamamura,  
 12 performed the systematic search of the seven electronic databases. All authors read and  
 13 approved the final manuscript.

14

## 15 **Acknowledgements**

16 The authors acknowledge the funding received from the Coordination for the  
 17 Improvement of Higher Education Personnel (CAPES) and National Council for  
 18 Scientific and Technological Development (CNPq), PEC-PG-Program, to the first and  
 19 second authors, as Doctoral Scholarships.

20

## 21 **Competing interests**

22 The authors declare that they have no competing interests.



1

2 **Funding**

3 This research was funded by the Coordination for the Improvement of Higher Education  
4 Personnel and National Council for Scientific and Technological  
5 Development (CAPES/CNPq), Processes numbers 9243143 and 9191134.

6

7 **REFERENCES**

- 8 1 American of Psychiatric Association. *Diagnostic and Statistical Manual of*  
9 *Mental Disorders*. Fifth edit. 2013.
- 10 2 McCabe MP, Sharlip ID, Lewis R, *et al*. Risk Factors for Sexual Dysfunction  
11 Among Women and Men: A Consensus Statement From the Fourth International  
12 Consultation on Sexual Medicine 2015. *J Sex Med* 2016;**13**:153–67.  
13 doi:10.1016/j.jsxm.2015.12.015
- 14 3 McCabe MP, Sharlip ID, Lewis R, *et al*. Incidence and Prevalence of Sexual  
15 Dysfunction in Women and Men: A Consensus Statement from the Fourth  
16 International Consultation on Sexual Medicine 2015. *J Sex Med* 2016;**13**:144–52.  
17 doi:10.1016/j.jsxm.2015.12.034
- 18 4 Abdool Z, Thakar R, Sultan AH. Postpartum female sexual function. *Eur J*  
19 *Obstet Gynecol Reprod Biol* 2009;**145**:133–7. doi:10.1016/j.ejogrb.2009.04.014
- 20 5 Convery KM, Spatz DL. Sexuality & breastfeeding: what do you know? *MCN*  
21 *Am J Matern Child Nurs* 2009;**34**:218–23.  
22 doi:10.1097/01.NMC.0000357913.87734.af

- 1  
2  
3 1 6 Leeman LM, Rogers RG. Sex after childbirth: postpartum sexual function. *Obstet*  
4  
5 2 *Gynecol* 2012;**119**:647–  
6  
7 3 55.<http://search.ebscohost.com/login.aspx?direct=true&db=c8h&AN=108163962>  
8  
9 4 &lang=pt-br&site=ehost-live  
10  
11  
12 5 7 Avery M, Duckett L, Frantzich CR. The experience of sexuality during  
13  
14 6 breastfeeding among primiparous women. *J Midwifery Womens Health*  
15  
16 7 2000;**45**:227–37. doi:10.1016/S1526-9523(00)00020-9  
17  
18  
19 8 8 Khajehei M, Doherty M, Tilley PJM, *et al.* Prevalence and Risk Factors of  
20  
21 9 Sexual Dysfunction in Postpartum Australian Women. *J Sex Med* 2015;**12**:1415–  
22  
23 10 26. doi:<https://doi.org/10.1111/jsm.12901>  
24  
25  
26 11 9 Acele EO, Karacam Z. Sexual problems in women during the first postpartum  
27  
28 12 year and related conditions. *J Clin Nurs* 2012;**21**:929–37. doi:10.1111/j.1365-  
29  
30 13 2702.2011.03882.x  
31  
32  
33  
34 14 10 Barrett G, Pendry E, Peacock J, *et al.* Women’s sexual health after childbirth.  
35  
36 15 *BJOG An Int J Obstet Gynaecol* 2000;**107**:186–95. doi:10.1111/j.1471-  
37  
38 16 0528.2000.tb11689.x  
39  
40  
41 17 11 Rowland M, Foxcroft L, Hopman WM, *et al.* Breastfeeding and sexuality  
42  
43 18 immediately post partum. *Can Fam Physician* 2005;**51**:1366–7.  
44  
45  
46 19 12 Shirvani MA, Bagheri-Nesami M, Bavand M. P507 Women’s sexual dysfunction  
47  
48 20 during the first year after child birth. *Int J Gynecol Obstet* 2009;**107**:S557–S557.  
49  
50 21 doi:10.1016/S0020-7292(09)61997-4  
51  
52  
53 22 13 Anbaran ZK, Baghdari N, Pourshirazi M, *et al.* Postpartum sexual function in  
54  
55 23 women and infant feeding methods. *J Pak Med Assoc* 2015;**65**:248–52.  
56  
57  
58  
59  
60

- 1  
2  
3 1 14 Malakoti J, Zamanzadeh V, Maleki A, *et al*. Sexual function in breastfeeding  
4 women in family health centers of tabriz, iran, 2012. *J caring Sci* 2013;**2**:141–6.  
5  
6  
7 3 doi:10.5681/jcs.2013.017  
8  
9  
10 4 15 Millheiser L. Female sexual function during pregnancy and postpartum. *J Sex*  
11  
12 5 *Med* 2012;**9**:635–6. doi:10.1111/j.1743-6109.2011.02637.x  
13  
14  
15 6 16 Woolhouse H, McDonald E, Brown S. Women’s experiences of sex and intimacy  
16  
17 7 after childbirth: making the adjustment to motherhood. *J Psychosom Obstet*  
18  
19 8 *Gynaecol* 2012;**33**:185–90. doi:10.3109/0167482X.2012.720314  
20  
21  
22 9 17 Arksey H, O’Malley L. Scoping studies: towards a methodological framework.  
23  
24 10 *Int J Soc Res Methodol* 2005;**8**:19–32. doi:10.1080/1364557032000119616  
25  
26  
27 11 18 Levac D, Colquhoun H, O’Brien KK. Scoping studies: advancing the  
28  
29 12 methodology. *Implement Sci* 2010;**5**:69. doi:10.1186/1748-5908-5-69  
30  
31  
32 13 19 Colquhoun HL, Levac D, O’Brien KK, *et al*. Scoping reviews: time for clarity in  
33  
34 14 definition, methods, and reporting. *J Clin Epidemiol* 2014;**67**:1291–4.  
35  
36 15 doi:10.1016/j.jclinepi.2014.03.013  
37  
38  
39 16 20 Shamseer L, Moher D, Clarke M, *et al*. Preferred reporting items for systematic  
40  
41 17 review and meta-analysis protocols (PRISMA-P) 2015: elaboration and  
42  
43 18 explanation. *BMJ* 2015;**350**:g7647.  
44  
45  
46  
47 19 21 World Health Organization. Indicators for assessing breastfeeding practices.  
48  
49 20 Geneva, Switzerland: 1991.  
50  
51 21 [http://www.who.int/maternal\\_child\\_adolescent/documents/cdd\\_ser\\_91\\_14/en/](http://www.who.int/maternal_child_adolescent/documents/cdd_ser_91_14/en/)  
52  
53  
54 22 22 World Health Organization. Defining Sexual Health: Report of technical  
55  
56  
57  
58  
59  
60

- 1  
2  
3 1 consultation on sexual health 28-31 January 2002, Geneva. *Sex Heal Doc Ser*  
4  
5 2 2006;:0–30.  
6  
7 3 doi:[http://www.who.int/reproductivehealth/publications/sexual\\_health/defining\\_s](http://www.who.int/reproductivehealth/publications/sexual_health/defining_sexual_health.pdf)  
8  
9 4 sexual\_health.pdf  
10  
11  
12 5 23 Pfaus JG. REVIEWS: Pathways of Sexual Desire. *J Sex Med* 2009;**6**:1506–33.  
13  
14 6 doi:10.1111/j.1743-6109.2009.01309.x  
15  
16  
17 7 24 Wiegel M, Meston C, Rosen R. The female sexual function index (FSFI): cross-  
18  
19 8 validation and development of clinical cutoff scores. *J Sex Marital Ther*  
20  
21 9 2005;**31**:1–20. doi:10.1080/00926230590475206  
22  
23  
24 10 25 Moher D, Liberati A, Tetzlaff J, *et al*. Preferred Reporting Items for Systematic  
25  
26 11 Reviews and Meta-Analyses: The PRISMA Statement. *PLoS Med*  
27  
28 12 2009;**6**:e1000097. doi:10.1371/journal.pmed.1000097  
29  
30  
31 13 26 Mathes T, Klassen P, Pieper D. Frequency of data extraction errors and methods  
32  
33 14 to increase data extraction quality: a methodological review. *BMC Med Res*  
34  
35 15 *Methodol* 2017;**17**:152. doi:10.1186/s12874-017-0431-4  
36  
37  
38 16 27 Cochrane Consumer and Communication Review Group. Data extraction  
39  
40 17 template. 2015.<http://cccr.org/cochrane.org/author-resources>.  
41  
42  
43  
44 18 28 Pace R, Pluye P, Bartlett G, *et al*. Testing the reliability and efficiency of the  
45  
46 19 pilot Mixed Methods Appraisal Tool (MMAT) for systematic mixed studies  
47  
48 20 review. *Int J Nurs Stud* 2012;**49**:47–53. doi:10.1016/j.ijnurstu.2011.07.002  
49  
50  
51 21 29 Clarke V, Braun V. Teaching thematic analysis: Over-coming challenges and  
52  
53 22 developing strategies for effective learning. *Psychologist* 2013;**26**:120–3.  
54  
55 23 doi:10.1191/1478088706qp063oa  
56  
57  
58  
59  
60

**PRISMA-P (Preferred Reporting Items for Systematic review and Meta-Analysis Protocols) 2015 checklist: recommended items to address in a systematic review protocol\***

| Section and topic                 | Item No | Checklist item                                                                                                                                                                                                                | Information report |    | Justification  | Line number(s) |
|-----------------------------------|---------|-------------------------------------------------------------------------------------------------------------------------------------------------------------------------------------------------------------------------------|--------------------|----|----------------|----------------|
|                                   |         |                                                                                                                                                                                                                               | Yes                | No |                |                |
| <b>ADMINISTRATIVE INFORMATION</b> |         |                                                                                                                                                                                                                               |                    |    |                |                |
| Title:                            |         |                                                                                                                                                                                                                               |                    |    |                |                |
| Identification                    | 1a      | Identify the report as a protocol of a systematic review                                                                                                                                                                      |                    | X  | Not applicable |                |
| Update                            | 1b      | If the protocol is for an update of a previous systematic review, identify as such                                                                                                                                            |                    | X  | Not applicable |                |
| Registration                      | 2       | If registered, provide the name of the registry (such as PROSPERO) and registration number                                                                                                                                    |                    | X  | Not applicable |                |
| Authors:                          |         |                                                                                                                                                                                                                               |                    |    |                |                |
| Contact                           | 3a      | Provide name, institutional affiliation, e-mail address of all protocol authors; provide physical mailing address of corresponding author                                                                                     | X                  |    |                | p.1, 1.6--26   |
| Contributions                     | 3b      | Describe contributions of protocol authors and identify the guarantor of the review                                                                                                                                           | X                  |    |                | p.11, 1.2-12   |
| Amendments                        | 4       | If the protocol represents an amendment of a previously completed or published protocol, identify as such and list changes; otherwise, state plan for documenting important protocol amendments                               |                    | X  | Not applicable |                |
| Support:                          |         |                                                                                                                                                                                                                               |                    |    |                |                |
| Sources                           | 5a      | Indicate sources of financial or other support for the review                                                                                                                                                                 | X                  |    |                | p.12, 1.4-7    |
| Sponsor                           | 5b      | Provide name for the review funder and/or sponsor                                                                                                                                                                             | X                  |    |                | p.12, 1.4-7    |
| Role of sponsor or funder         | 5c      | Describe roles of funder(s), sponsor(s), and/or institution(s), if any, in developing the protocol                                                                                                                            | X                  |    |                | p.12, 1.4-7    |
| <b>INTRODUCTION</b>               |         |                                                                                                                                                                                                                               |                    |    |                |                |
| Rationale                         | 6       | Describe the rationale for the review in the context of what is already known                                                                                                                                                 | X                  |    |                | p.3, 1.1-21    |
| Objectives                        | 7       | Provide an explicit statement of the question(s) the review will address with reference to participants, interventions, comparators, and outcomes (PICO)                                                                      | X                  |    |                | p.3, 1.22-24   |
| <b>METHODS</b>                    |         |                                                                                                                                                                                                                               |                    |    |                |                |
| Eligibility criteria              | 8       | Specify the study characteristics (such as PICO, study design, setting, time frame) and report characteristics (such as years considered, language, publication status) to be used as criteria for eligibility for the review | X                  |    |                | p.5, 1.5-119   |

|                                    |     |                                                                                                                                                                                                                                                  |   |   |                             |
|------------------------------------|-----|--------------------------------------------------------------------------------------------------------------------------------------------------------------------------------------------------------------------------------------------------|---|---|-----------------------------|
| Information sources                | 9   | Describe all intended information sources (such as electronic databases, contact with study authors, trial registers or other grey literature sources) with planned dates of coverage                                                            | X |   | p.6, l.4-8                  |
| Search strategy                    | 10  | Present draft of search strategy to be used for at least one electronic database, including planned limits, such that it could be repeated                                                                                                       | X |   | p.5, l. 8-13<br>p.6, l.1-3  |
| Study records:                     |     |                                                                                                                                                                                                                                                  |   |   |                             |
| Data management                    | 11a | Describe the mechanism(s) that will be used to manage records and data throughout the review                                                                                                                                                     | X |   | p.6, l.11-17                |
| Selection process                  | 11b | State the process that will be used for selecting studies (such as two independent reviewers) through each phase of the review (that is, screening, eligibility and inclusion in meta-analysis)                                                  | X |   | p.6, l.18-23<br>p.7, l. 1-4 |
| Data collection process            | 11c | Describe planned method of extracting data from reports (such as piloting forms, done independently, in duplicate), any processes for obtaining and confirming data from investigators                                                           | X |   | p.7, l.22-23<br>p.8, l.1-7  |
| Data items                         | 12  | List and define all variables for which data will be sought (such as PICO items, funding sources), any pre-planned data assumptions and simplifications                                                                                          | X |   | p.9, l.6-19                 |
| Outcomes and prioritization        | 13  | List and define all outcomes for which data will be sought, including prioritization of main and additional outcomes, with rationale                                                                                                             |   | X | Not applicable              |
| Risk of bias in individual studies | 14  | Describe anticipated methods for assessing risk of bias of individual studies, including whether this will be done at the outcome or study level, or both; state how this information will be used in data synthesis                             | X |   | p.8, l.18-24<br>p.9, l.1-3  |
| Data synthesis                     | 15a | Describe criteria under which study data will be quantitatively synthesised                                                                                                                                                                      | X |   | p.9, l.5-11                 |
|                                    | 15b | If data are appropriate for quantitative synthesis, describe planned summary measures, methods of handling data and methods of combining data from studies, including any planned exploration of consistency (such as $I^2$ , Kendall's $\tau$ ) | X |   | p.9, l. 12-14               |
|                                    | 15c | Describe any proposed additional analyses (such as sensitivity or subgroup analyses, meta-regression)                                                                                                                                            |   | X | Not applicable              |
|                                    | 15d | If quantitative synthesis is not appropriate, describe the type of summary planned                                                                                                                                                               | X |   | p.9, l.15-19                |
| Meta-bias(es)                      | 16  | Specify any planned assessment of meta-bias(es) (such as publication bias across studies, selective reporting within studies)                                                                                                                    |   | X | Not applicable              |
| Confidence in cumulative evidence  | 17  | Describe how the strength of the body of evidence will be assessed (such as GRADE)                                                                                                                                                               |   | X | Not applicable              |

**\* It is strongly recommended that this checklist be read in conjunction with the PRISMA-P Explanation and Elaboration (cite when available) for important clarification on the items. Amendments to a review protocol should be tracked and dated. The copyright for PRISMA-P (including checklist) is held by the PRISMA-P Group and is distributed under a Creative Commons Attribution Licence 4.0.**

1  
2  
3  
4 From: Shamseer L, Moher D, Clarke M, Ghersi D, Liberati A, Petticrew M, Shekelle P, Stewart L, PRISMA-P Group. Preferred reporting items for systematic review and  
5 meta-analysis protocols (PRISMA-P) 2015: elaboration and explanation. *BMJ*. 2015 Jan 2;349(jan02 1):g7647.  
6  
7  
8  
9  
10  
11  
12  
13  
14  
15  
16  
17  
18  
19  
20  
21  
22  
23  
24  
25  
26  
27  
28  
29  
30  
31  
32  
33  
34  
35  
36  
37  
38  
39  
40  
41  
42  
43  
44  
45  
46

For peer review only

## Supplementary file 2

### Search strategy

Search: PubMed strategy

1. "Breast Feeding"[Mesh]
2. "Lactation"[Mesh]
3. "Postpartum Period"[Mesh]
4. "Lactation"
5. "Breast Feeding"
6. "Postpartum Period"
7. OR/1-6
8. "Sexuality"[Mesh]
9. "Sexual Behavior"[Mesh]
10. "Sexual Partners"[Mesh]
11. "Sexuality"
12. "Sexual Behavior"
13. "Sexual Partners"
14. OR/8-13
15. "Sexual Dysfunction, Physiological"[Mesh]
16. "Sexual Dysfunctions, Psychological"[Mesh]
17. "Sexual Dysfunction, Female"
18. "Psychosexual Disorders"
19. "Sexual Dysfunction, Physiological"
20. "Physiological Sexual Dysfunction"
21. "Physiological Sexual Dysfunctions"
22. "Sexual Dysfunctions, Physiological"
23. "Sexual Disorders, Physiological"
24. "Physiological Sexual Disorder"
25. "Physiological Sexual Disorders"
26. "Sexual Disorder, Physiological"
27. "Sex Disorders"
28. "Sexual Dysfunctions, Psychological"
29. "Dysfunction, Psychological Sexual"



- 1
- 2
- 3 30. "Dysfunctions, Psychological Sexual"
- 4 31. "Psychological Sexual Dysfunction"
- 5 32. "Psychological Sexual Dysfunctions"
- 6 33. "Sexual Dysfunction, Psychological"
- 7 34. "Psychosexual Dysfunctions"
- 8 35. "Dysfunction, Psychosexual"
- 9 36. "Dysfunctions, Psychosexual"
- 10 37. "Psychosexual Dysfunction"
- 11 38. "Psychosexual Disorders"
- 12 39. "Disorder, Psychosexual"
- 13 40. "Disorders, Psychosexual"
- 14 41. "Psychosexual Disorder"
- 15 42. "Hypoactive Sexual Desire Disorder"
- 16 43. "Sexual Aversion Disorder"
- 17 44. "Aversion Disorders, Sexual"
- 18 45. "Disorders, Sexual Aversion"
- 19 46. "Sexual Aversion Disorders"
- 20 47. "Orgasmic Disorder"
- 21 48. "Disorders, Orgasmic"
- 22 49. "Orgasmic Disorders"
- 23 50. "Sexual Arousal Disorder"
- 24 51. "Arousal Disorders, Sexual"
- 25 52. "Disorders, Sexual Arousal"
- 26 53. "Sexual Arousal Disorders"
- 27 54. "Frigidity"
- 28 55. OR/15-54
- 29 56. 7 AND 14 AND 55
- 30
- 31
- 32
- 33
- 34
- 35
- 36
- 37
- 38
- 39
- 40
- 41
- 42
- 43
- 44
- 45
- 46
- 47
- 48
- 49
- 50
- 51
- 52
- 53
- 54
- 55
- 56
- 57
- 58
- 59
- 60

Figure 1 PRISMA Flow Diagram

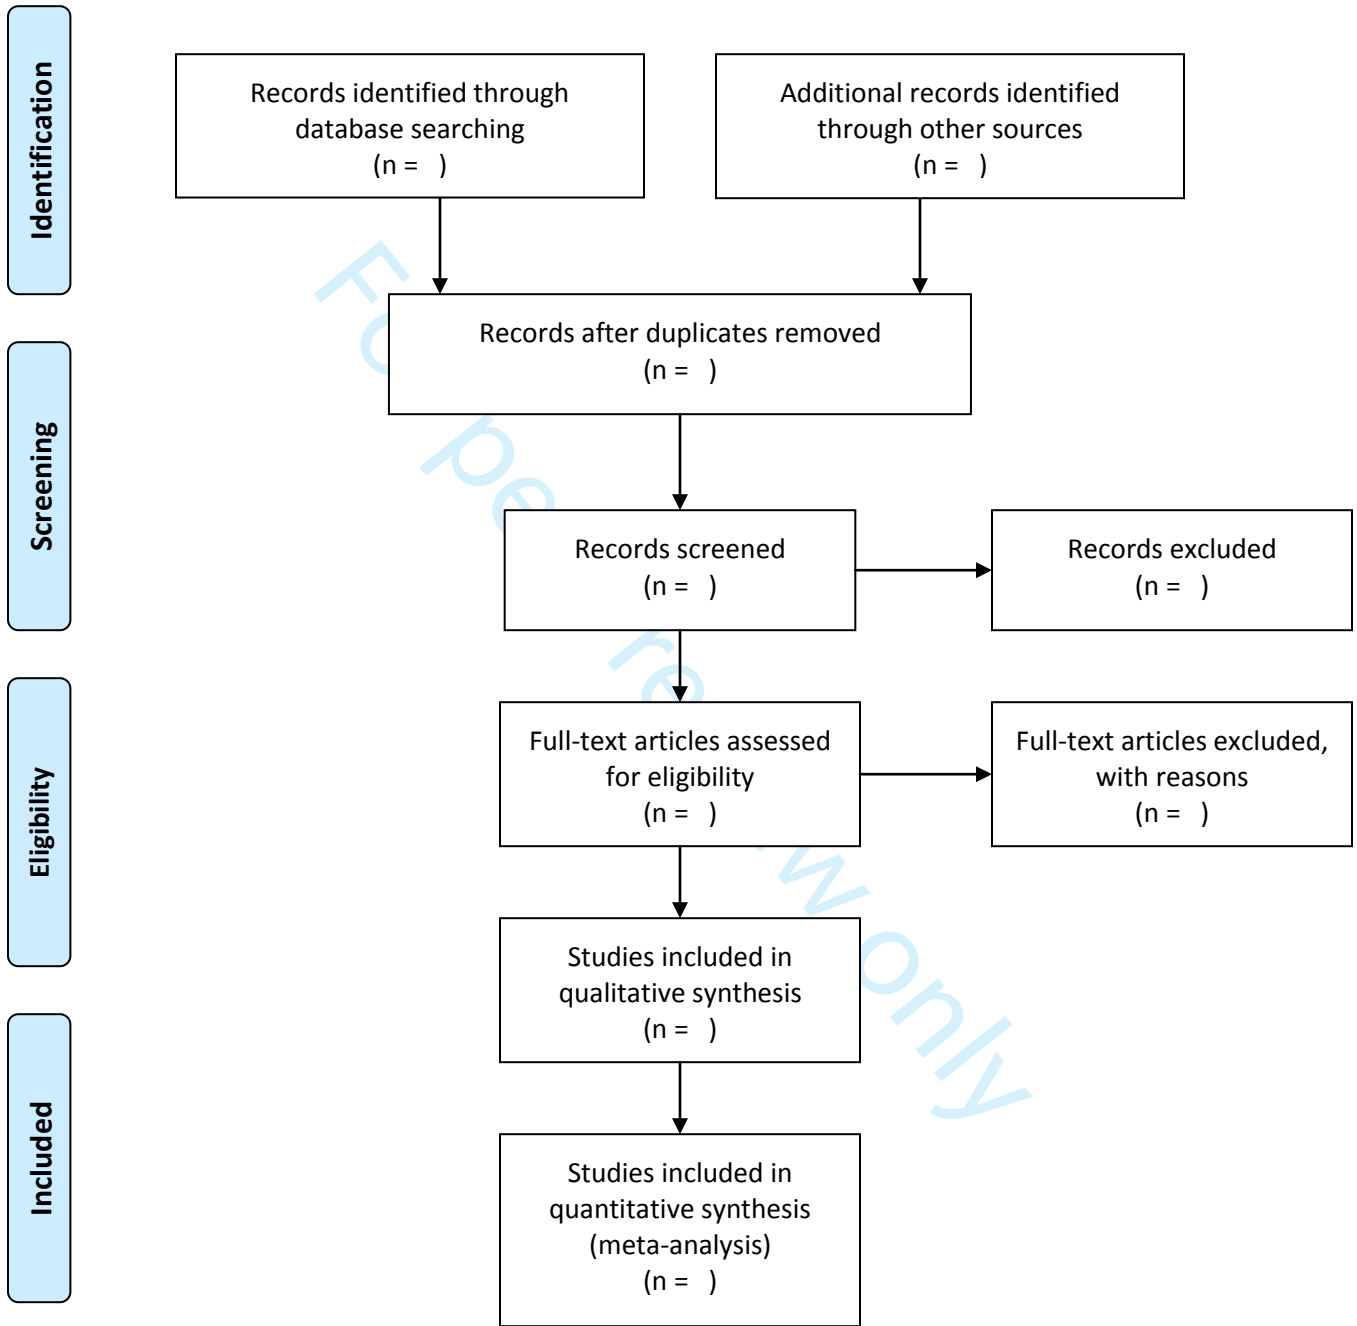

**Supplementary file 4**  
**Data collection form**

|                                    |                                                                                                                                                                                                                                                                                                                                                                                                               |
|------------------------------------|---------------------------------------------------------------------------------------------------------------------------------------------------------------------------------------------------------------------------------------------------------------------------------------------------------------------------------------------------------------------------------------------------------------|
| Title of review                    | Factors that contributing to development of the sexual dysfunction in nursing women: A Systematic Scoping Review Protocol                                                                                                                                                                                                                                                                                     |
| Reviewer                           |                                                                                                                                                                                                                                                                                                                                                                                                               |
| Date of review                     |                                                                                                                                                                                                                                                                                                                                                                                                               |
| Form version                       |                                                                                                                                                                                                                                                                                                                                                                                                               |
| Contact with author                | Date, reason, resolved                                                                                                                                                                                                                                                                                                                                                                                        |
| Notes                              |                                                                                                                                                                                                                                                                                                                                                                                                               |
| Study identification               |                                                                                                                                                                                                                                                                                                                                                                                                               |
| Report number                      | Last name first author-year of the reference                                                                                                                                                                                                                                                                                                                                                                  |
| Study number                       | Last name first author-year of the primary reference                                                                                                                                                                                                                                                                                                                                                          |
| Title                              | Author(s)                                                                                                                                                                                                                                                                                                                                                                                                     |
|                                    | Source<br><input type="checkbox"/> research article <input type="checkbox"/> abstract <input type="checkbox"/> conference proceeding<br><input type="checkbox"/> non-research article <input type="checkbox"/> review <input type="checkbox"/> guideline<br><input type="checkbox"/> recommendation other (eg. Unpublished date)                                                                              |
| Source 2                           | <input type="checkbox"/> PubMed <input type="checkbox"/> Excerpta Medica Database (EMBASE)<br><input type="checkbox"/> Cumulative Index to Nursing and Allied Health Literature (CINAHL) <input type="checkbox"/> PsycINFO <input type="checkbox"/> Science Direct<br><input type="checkbox"/> Web of Science <input type="checkbox"/> Google Scholar                                                         |
| Year                               |                                                                                                                                                                                                                                                                                                                                                                                                               |
| Volume                             |                                                                                                                                                                                                                                                                                                                                                                                                               |
| Page (start-end)                   |                                                                                                                                                                                                                                                                                                                                                                                                               |
| Contact                            |                                                                                                                                                                                                                                                                                                                                                                                                               |
| Country                            |                                                                                                                                                                                                                                                                                                                                                                                                               |
| Language                           |                                                                                                                                                                                                                                                                                                                                                                                                               |
| Funding                            |                                                                                                                                                                                                                                                                                                                                                                                                               |
| Notes                              |                                                                                                                                                                                                                                                                                                                                                                                                               |
| Eligibility of study in the review |                                                                                                                                                                                                                                                                                                                                                                                                               |
| Inclusion criteria                 | Literature in English, Spanish and Portuguese focused on one or more three research questions.<br>Original studies of qualitative or quantitative approach; literature review independent of the method used; communications.<br>Gray literature, annals of congresses, conferences, organizations societies; academic dissertations, theses conference, books, chapters of books and governmental documents. |
| Notes                              |                                                                                                                                                                                                                                                                                                                                                                                                               |
| Study details                      |                                                                                                                                                                                                                                                                                                                                                                                                               |

|                                                                  |                                                                                                                        |
|------------------------------------------------------------------|------------------------------------------------------------------------------------------------------------------------|
| Setting                                                          | Country(ies)/province(s)/state(s)                                                                                      |
| Period of study                                                  | Dates start-end                                                                                                        |
| Study exclusion criteria                                         | Studies focusing on the sexuality of pregnant women and reports with partial or inconsistent results will be excluded. |
| REB approval                                                     | <input type="checkbox"/> yes <input type="checkbox"/> no <input type="checkbox"/> unclear                              |
| Study design                                                     |                                                                                                                        |
| Primary data source                                              |                                                                                                                        |
| Secondary data source                                            |                                                                                                                        |
| Other data sources                                               |                                                                                                                        |
| Notes                                                            |                                                                                                                        |
| Population characteristics                                       |                                                                                                                        |
| Sample size (n)                                                  | Patients:                                                                                                              |
| Age                                                              | e.g. n(%), mean (SD), median (quartiles)                                                                               |
| Sexual behaviors of nursing women                                |                                                                                                                        |
| Aspects related to sexuality in nursing women                    |                                                                                                                        |
| Types of sexual dysfunction of the nursing women                 |                                                                                                                        |
| Factors that contributing to sexual dysfunction in nursing women |                                                                                                                        |

\*Adapted from Cochrane Consumer and Communication Review Group Data extraction template.
