# Supplementary material for: What are the factors that contribute to the development of sexual dysfunction in breastfeeding women? A systematic scoping review protocol
Source: PubMed Central journal article supplement — BMJ Open. 2018 Aug 30;8(8):e022863. doi: 10.1136/bmjopen-2018-022863 (PMC6119408; doi:10.1136/bmjopen-2018-022863), 2018-08-30
Supplement: bmjopen-2018-022863supp002.pdf [file bmjopen-2018-022863supp002.pdf]

## Supplementary file 2

### Search strategy

Search: PubMed strategy

1. "Breast Feeding"[Mesh]
2. "Lactation"[Mesh]
3. "Postpartum Period"[Mesh]
4. "Lactation"
5. "Breast Feeding"
6. "Postpartum Period"
7. OR/1-6
8. "Sexuality"[Mesh]
9. "Sexual Behavior"[Mesh]
10. "Sexual Partners"[Mesh]
11. "Sexuality"
12. "Sexual Behavior"
13. "Sexual Partners"
14. OR/8-13
15. "Sexual Dysfunction, Physiological"[Mesh]
16. "Sexual Dysfunctions, Psychological"[Mesh]
17. "Sexual Dysfunction, Female"
18. "Psychosexual Disorders"
19. "Sexual Dysfunction, Physiological"
20. "Physiological Sexual Dysfunction"
21. "Physiological Sexual Dysfunctions"
22. "Sexual Dysfunctions, Physiological"
23. "Sexual Disorders, Physiological"
24. "Physiological Sexual Disorder"
25. "Physiological Sexual Disorders"
26. "Sexual Disorder, Physiological"
27. "Sex Disorders"
28. "Sexual Dysfunctions, Psychological"
29. "Dysfunction, Psychological Sexual"

30. "Dysfunctions, Psychological Sexual"
31. "Psychological Sexual Dysfunction"
32. "Psychological Sexual Dysfunctions"
33. "Sexual Dysfunction, Psychological"
34. "Psychosexual Dysfunctions"
35. "Dysfunction, Psychosexual"
36. "Dysfunctions, Psychosexual"
37. "Psychosexual Dysfunction"
38. "Psychosexual Disorders"
39. "Disorder, Psychosexual"
40. "Disorders, Psychosexual"
41. "Psychosexual Disorder"
42. "Hypoactive Sexual Desire Disorder"
43. "Sexual Aversion Disorder"
44. "Aversion Disorders, Sexual"
45. "Disorders, Sexual Aversion"
46. "Sexual Aversion Disorders"
47. "Orgasmic Disorder"
48. "Disorders, Orgasmic"
49. "Orgasmic Disorders"
50. "Sexual Arousal Disorder"
51. "Arousal Disorders, Sexual"
52. "Disorders, Sexual Arousal"
53. "Sexual Arousal Disorders"
54. "Frigidity"
55. OR/15-54
56. 7 AND 14 AND 55
