# Supplementary material for: What are the factors that contribute to the development of sexual dysfunction in breastfeeding women? A systematic scoping review protocol
Source: PubMed Central journal article supplement — BMJ Open. 2018 Aug 30;8(8):e022863. doi: 10.1136/bmjopen-2018-022863 (PMC6119408; doi:10.1136/bmjopen-2018-022863), 2018-08-30
Supplement: bmjopen-2018-022863supp004.pdf [file bmjopen-2018-022863supp004.pdf]

**Supplementary file 4**  
**Data collection form**

|                                    |                                                                                                                                                                                                                                                                                                                                                                                                               |
|------------------------------------|---------------------------------------------------------------------------------------------------------------------------------------------------------------------------------------------------------------------------------------------------------------------------------------------------------------------------------------------------------------------------------------------------------------|
| Title of review                    | Factors that contributing to development of the sexual dysfunction in nursing women: A Systematic Scoping Review Protocol                                                                                                                                                                                                                                                                                     |
| Reviewer                           |                                                                                                                                                                                                                                                                                                                                                                                                               |
| Date of review                     |                                                                                                                                                                                                                                                                                                                                                                                                               |
| Form version                       |                                                                                                                                                                                                                                                                                                                                                                                                               |
| Contact with author                | Date, reason, resolved                                                                                                                                                                                                                                                                                                                                                                                        |
| Notes                              |                                                                                                                                                                                                                                                                                                                                                                                                               |
| Study identification               |                                                                                                                                                                                                                                                                                                                                                                                                               |
| Report number                      | Last name first author-year of the reference                                                                                                                                                                                                                                                                                                                                                                  |
| Study number                       | Last name first author-year of the primary reference                                                                                                                                                                                                                                                                                                                                                          |
| Title                              | Author(s)                                                                                                                                                                                                                                                                                                                                                                                                     |
|                                    | Source<br><br><input type="checkbox"/> research article <input type="checkbox"/> abstract <input type="checkbox"/> conference proceeding<br><input type="checkbox"/> non-research article <input type="checkbox"/> review <input type="checkbox"/> guideline<br><input type="checkbox"/> recommendation other (eg. Unpublished date)                                                                          |
| Source 2                           | <input type="checkbox"/> PubMed <input type="checkbox"/> Excerpta Medica Database (EMBASE)<br><input type="checkbox"/> Cumulative Index to Nursing and Allied Health Literature (CINAHL) <input type="checkbox"/> PsycINFO <input type="checkbox"/> Science Direct<br><input type="checkbox"/> Web of Science <input type="checkbox"/> Google Scholar                                                         |
| Year                               |                                                                                                                                                                                                                                                                                                                                                                                                               |
| Volume                             |                                                                                                                                                                                                                                                                                                                                                                                                               |
| Page (start-end)                   |                                                                                                                                                                                                                                                                                                                                                                                                               |
| Contact                            |                                                                                                                                                                                                                                                                                                                                                                                                               |
| Country                            |                                                                                                                                                                                                                                                                                                                                                                                                               |
| Language                           |                                                                                                                                                                                                                                                                                                                                                                                                               |
| Funding                            |                                                                                                                                                                                                                                                                                                                                                                                                               |
| Notes                              |                                                                                                                                                                                                                                                                                                                                                                                                               |
| Eligibility of study in the review |                                                                                                                                                                                                                                                                                                                                                                                                               |
| Inclusion criteria                 | Literature in English, Spanish and Portuguese focused on one or more three research questions.<br>Original studies of qualitative or quantitative approach; literature review independent of the method used; communications.<br>Gray literature, annals of congresses, conferences, organizations societies; academic dissertations, theses conference, books, chapters of books and governmental documents. |
| Notes                              |                                                                                                                                                                                                                                                                                                                                                                                                               |
| Study details                      |                                                                                                                                                                                                                                                                                                                                                                                                               |

|                                                                  |                                                                                                                        |
|------------------------------------------------------------------|------------------------------------------------------------------------------------------------------------------------|
| Setting                                                          | Country(ies)/province(s)/state(s)                                                                                      |
| Period of study                                                  | Dates start-end                                                                                                        |
| Study exclusion criteria                                         | Studies focusing on the sexuality of pregnant women and reports with partial or inconsistent results will be excluded. |
| REB approval                                                     | <input type="checkbox"/> yes <input type="checkbox"/> no <input type="checkbox"/> unclear                              |
| Study design                                                     |                                                                                                                        |
| Primary data source                                              |                                                                                                                        |
| Secondary data source                                            |                                                                                                                        |
| Other data sources                                               |                                                                                                                        |
| Notes                                                            |                                                                                                                        |
| Population characteristics                                       |                                                                                                                        |
| Sample size (n)                                                  | Patients:                                                                                                              |
| Age                                                              | e.g. n(%), mean (SD), median (quartiles)                                                                               |
| Sexual behaviors of nursing women                                |                                                                                                                        |
| Aspects related to sexuality in nursing women                    |                                                                                                                        |
| Types of sexual dysfunction of the nursing women                 |                                                                                                                        |
| Factors that contributing to sexual dysfunction in nursing women |                                                                                                                        |

\*Adapted from Cochrane Consumer and Communication Review Group Data extraction template.
