# Supplementary figures and images for: What are the factors that contribute to the development of sexual dysfunction in breastfeeding women? A systematic scoping review protocol
Source: PubMed Central journal article supplement — BMJ Open. 2018 Aug 30;8(8):e022863. doi: 10.1136/bmjopen-2018-022863 (PMC6119408; doi:10.1136/bmjopen-2018-022863), 2018-08-30

**Figure 1** PRISMA Flow Diagram

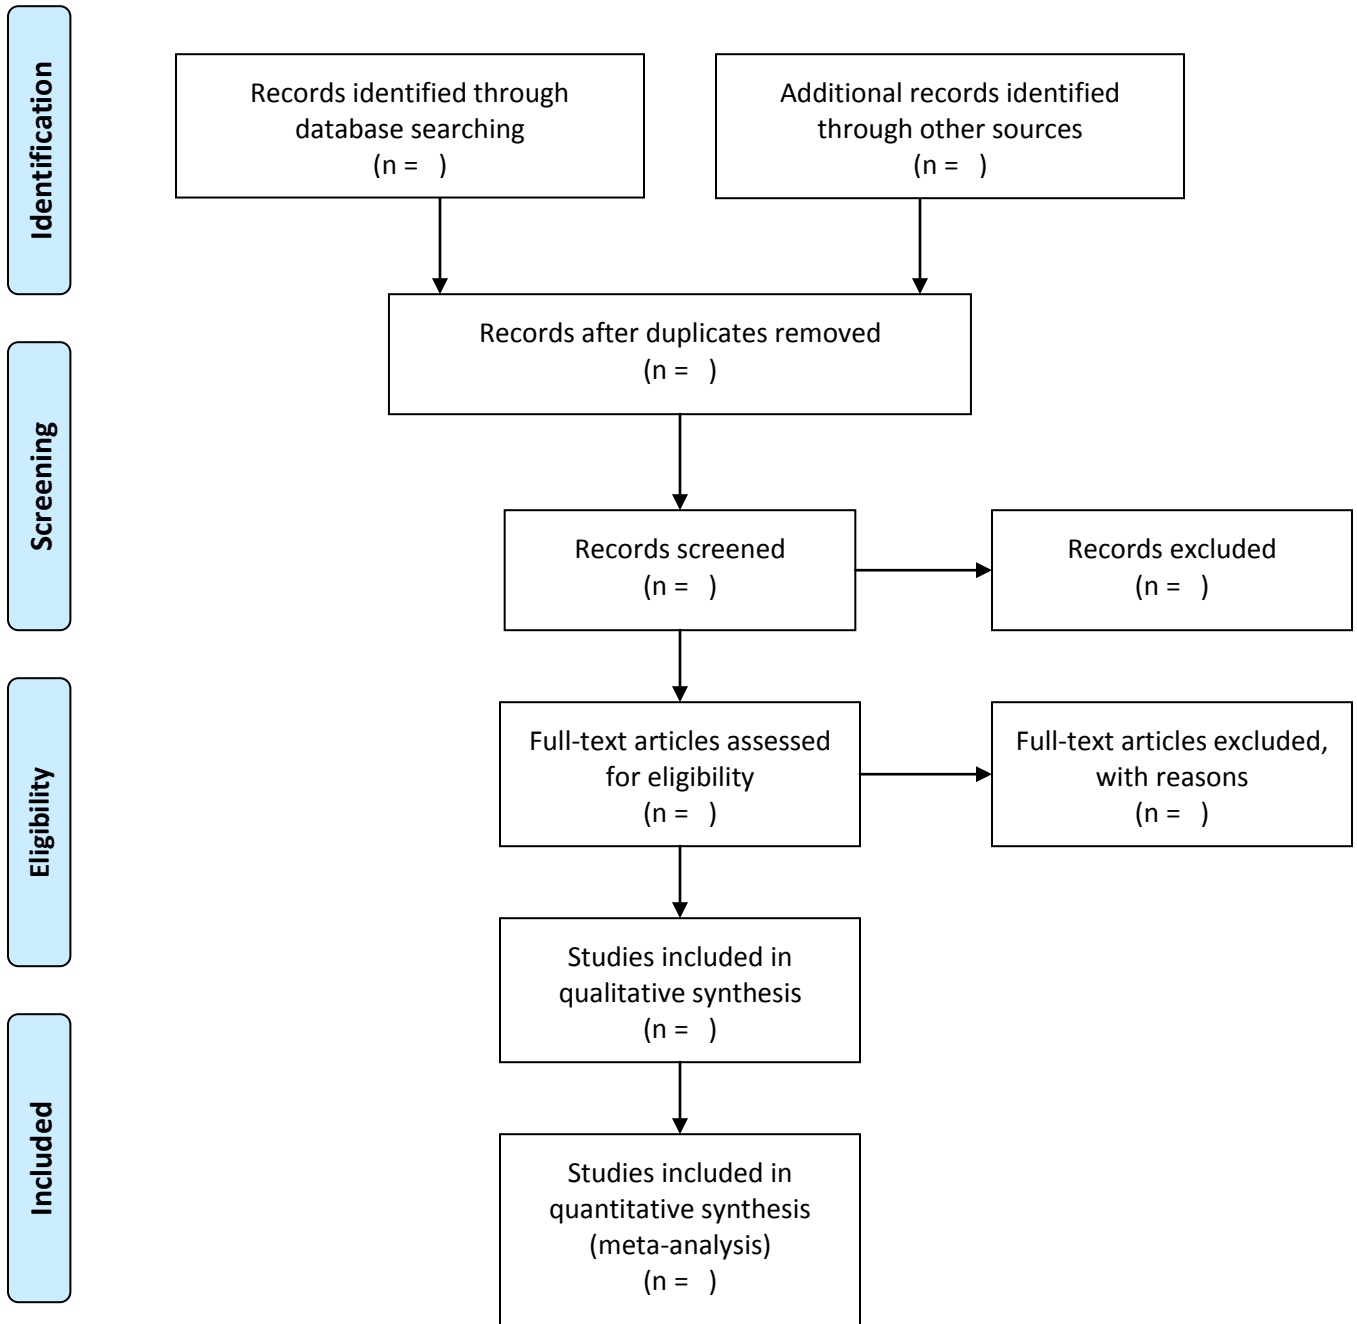

Supplement: bmjopen-2018-022863supp003.pdf [file bmjopen-2018-022863supp003.pdf]
